# Supplementary material for: Human papillomavirus and the landscape of secondary genetic alterations in oral cancers
Source: HighWire-hosted journal article supplement (doi:10.1101/gr.241141.118), 2018-12-18
Supplement: Supplemental_Table_S1.xlsx [file Supplemental_Table_S1.xlsx]

## Sheet: S1A
		HPV-positive HNSCC						HPV-negative HNSCC						all HNSCC
		Ohio, n=86		TCGA, n=63		subtotal, n=149		Ohio, n=26		TCGA, n=309		subtotal, n=335		total, n=484
category	group	n	%total	n	%total	subtotal	% subtotal	n	%total	n	%total	subtotal	% subtotal	total	% total
gender	female	8	0.093	6	0.095	14	0.0939597	10	0.385	105	0.34	115	0.343284	129	0.266529
	male	78	0.907	57	0.905	135	0.90604	16	0.615	204	0.66	220	0.656716	355	0.733471
race	Caucasian	78	0.907	61	0.968	139	0.932886	23	0.885	270	0.874	293	0.874627	432	0.892562
	African American	3	0.035	2	0.032	5	0.033557	3	0.115	18	0.058	21	0.0626866	26	0.053719
	Asian	0	0	0	0	0	0	0	0	9	0.029	9	0.0268657	9	0.018595
	American Indian or Alaska native	1	0.012	0	0	1	0.00671141	0	0	1	0.003	1	0.00298507	2	0.00413223
	multiple/ other/ unknown	4	0.047	0	0	4	0.0268456	0	0	0	0	0	0	4	0.00826446
	not available	0	0	0	0	0	0	0	0	11	0.036	11	0.0328358	11	0.0227273
ethnicity	Hispanic or Latino	2	0.023	2	0.032	4	0.0268456	0	0	16	0.052	16	0.0477612	20	0.0413223
	not Hispanic or Latino	84	0.977	58	0.921	142	0.95302	26	1	271	0.877	297	0.886567	439	0.907025
	not available	0	0	3	0.048	3	0.0201342	0	0	22	0.071	22	0.0656716	25	0.0516529
age (yrs)	18-39	1	0.012	2	0.032	3	0.0201342	2	0.077	14	0.045	16	0.0477612	19	0.0392562
	40-49	12	0.14	11	0.175	23	0.154362	3	0.115	41	0.133	44	0.131343	67	0.13843
	50-59	38	0.442	31	0.492	69	0.463087	10	0.385	79	0.256	89	0.265672	158	0.326446
	60-69	29	0.337	12	0.19	41	0.275168	5	0.192	95	0.307	100	0.298507	141	0.291322
	70-89	6	0.07	7	0.111	13	0.0872483	6	0.231	79	0.256	85	0.253731	98	0.202479
primary site	alveolar ridge	0	0	4	0.063	4	0.0268456	0	0	14	0.045	14	0.041791	18	0.0371901
	base of tongue	27	0.314	16	0.254	43	0.288591	2	0.077	11	0.036	13	0.038806	56	0.115702
	buccal mucosa	0	0	0	0	0	0	0	0	21	0.068	21	0.0626866	21	0.0433884
	floor of mouth	0	0	1	0.016	1	0.00671141	0	0	57	0.184	57	0.170149	58	0.119835
	hard palate	0	0	1	0.016	1	0.00671141	0	0	6	0.019	6	0.0179104	7	0.0144628
	oral cavity	0	0	5	0.079	5	0.033557	0	0	66	0.214	66	0.197015	71	0.146694
	oral tongue	4	0.047	5	0.079	9	0.0604027	20	0.769	119	0.385	139	0.414925	148	0.305785
	oropharynx	0	0	1	0.016	1	0.00671141	0	0	7	0.023	7	0.0208955	8	0.0165289
	tonsil	49	0.57	30	0.476	79	0.530201	3	0.115	8	0.026	11	0.0328358	90	0.18595
	multiple primary site	1	0.012	0	0	1	0.00671141	1	0.038	0	0	1	0.00298507	2	0.00413223
	unknown	5	0.058	0	0	5	0.033557	0	0	0	0	0	0	5	0.0103306
T-stage	T1	24	0.279	8	0.127	32	0.214765	0	0	19	0.061	19	0.0567164	51	0.105372
	T2	33	0.384	29	0.46	62	0.416107	20	0.769	96	0.311	116	0.346269	178	0.367769
	T3	14	0.163	8	0.127	22	0.147651	5	0.192	82	0.265	87	0.259701	109	0.225207
	T4a/b	9	0.105	14	0.222	23	0.154362	1	0.038	83	0.269	84	0.250746	107	0.221074
	TX	0	0	1	0.016	1	0.00671141	0	0	7	0.023	7	0.0208955	8	0.0165289
	not available	0	0	0	0	0	0	0	0	3	0.01	3	0.00895522	3	0.00619835
N-stage	N0	6	0.07	18	0.286	24	0.161074	7	0.269	165	0.534	172	0.513433	196	0.404959
	N1	10	0.116	7	0.111	17	0.114094	7	0.269	53	0.172	60	0.179104	77	0.159091
	N2/a/b/c	67	0.779	35	0.556	102	0.684564	10	0.385	74	0.239	84	0.250746	186	0.384298
	N3	2	0.023	3	0.048	5	0.033557	2	0.077	2	0.006	4	0.0119403	9	0.018595
	Nx	1	0.012	0	0	1	0.00671141	0	0	0	0	0	0	1	0.00206612
	not available	0	0	0	0	0	0	0	0	3	0.01	3	0.00895522	3	0.00619835
M-stage	M0	28	0.326	61	0.968	89	0.597315	1	0.038	292	0.945	293	0.874627	382	0.789256
	M1	1	0.012	0	0	1	0.00671141	0	0	1	0.003	1	0.00298507	2	0.00413223
	MX	55	0.64	2	0.032	57	0.38255	25	0.962	13	0.042	38	0.113433	95	0.196281
	not available	0	0	0	0	0	0	0	0	3	0.01	3	0.00895522	3	0.00619835
tumor grade	G1	0	0	1	0.016	1	0.00671141	1	0.038	53	0.172	54	0.161194	55	0.113636
	G2	27	0.314	23	0.365	50	0.33557	22	0.846	192	0.621	214	0.638806	264	0.545455
	G3	35	0.407	24	0.381	59	0.395973	2	0.077	59	0.191	61	0.18209	120	0.247934
	GX	0	0	7	0.111	7	0.0469799	0	0	4	0.013	4	0.0119403	11	0.0227273
	not available	24	0.279	2	0.032	26	0.174497	1	0.038	1	0.003	2	0.00597015	28	0.0578512
p16 assay HPV	positive	80	0.93	27	0.429	107	0.718121	2	0.077	0	0	2	0.00597015	109	0.225207
	negative	1	0.012	0	0	1	0.00671141	8	0.308	53	0.172	61	0.18209	62	0.128099
	not available	5	0.058	36	0.571	41	0.275168	16	0.615	256	0.828	272	0.81194	313	0.646694
ISH assay HPV	positive	77	0.895349	17	0.269841	94	0.630872	0	0	0	0	0	0	94	0.194215
	negative	4	0.0465116	0	0	4	0.0268456	9	0.346154	45	0.145631	54	0.161194	58	0.119835
	not available	5	0.0581395	46	0.730159	51	0.342282	17	0.653846	264	0.854369	281	0.838806	332	0.68595
HPV status	positive	86	1	63	1	149	1	0	0	0	0	0	0	149	0.307851
	negative	0	0	0	0	0	0	26	1	309	1	335	1	335	0.692149

## Sheet: S1B
dataset	CGI-WGS	Illum.-WGS	TCGA-WGS
number of cases	59	53	41
median depth of coverage (normal)	93.2	49	41.1
range of depth of coverage (normal)	80.4-105.5	42.0-64.1	30.1-52.2
median depth of coverage (tumor)	93.5	102.3	67.7
range of depth of coverage (tumor)	77.8-108.6	90.8-139.6	38.6-84.7

## Sheet: S1C
Sample ID	HPV	HPV type	platform	normal depth (x)	tumor depth (x)	#SNV (WGS)	#Indel (WGS)	#SNV (exon)	#Indel (exon)	SNV rate in exon (per Mbp)
GS18001	pos	HPV16	Illum.-WGS	60.4	107.8	180708	105	3959	2	78.57
GS18002	pos	HPV16	Illum.-WGS	59.9	108.3	70894	89	1301	2	25.82
GS18003	pos	HPV16	Illum.-WGS	48.8	90.8	49410	1	1190	0	23.62
GS18004	pos	HPV16	CGI-WGS	98.4	94.3	47971	214	1042	6	20.68
GS18005	pos	HPV16	Illum.-WGS	48.2	92.3	47206	80	794	1	15.76
GS18006	pos	HPV16	CGI-WGS	100.4	98.8	31331	74	755	4	14.98
GS18007	pos	HPV16	Illum.-WGS	42.8	139.6	34497	0	717	0	14.23
GS18008	pos	HPV16	Illum.-WGS	43.2	104.7	37881	79	685	2	13.59
GS18009	pos	HPV16	Illum.-WGS	46.5	107.7	26888	126	533	2	10.58
GS18010	pos	HPV16	Illum.-WGS	50.9	102.3	29857	137	491	2	9.74
GS18011	pos	HPV16	Illum.-WGS	45.2	98.3	22244	11	436	0	8.65
GS18012	pos	HPV16	Illum.-WGS	45.6	104.7	20193	271	392	5	7.78
GS18013	pos	HPV16	Illum.-WGS	51.4	103.8	18973	123	358	5	7.1
GS18014	pos	HPV16	Illum.-WGS	50	99.1	19546	13	355	0	7.04
GS18015	pos	HPV16	Illum.-WGS	52.7	101.1	18524	237	336	5	6.67
GS18016	pos	HPV16	CGI-WGS	105.2	108.6	13383	45	328	1	6.51
GS18017	pos	HPV16	Illum.-WGS	44.9	99.2	14722	160	308	3	6.11
GS18018	pos	HPV16	Illum.-WGS	44.4	107.5	14912	158	296	2	5.87
GS18019	pos	HPV16	CGI-WGS	93.7	93.6	13173	42	288	3	5.72
GS18020	pos	HPV35	Illum.-WGS	49.5	110.5	17152	23	286	1	5.68
GS18021	pos	HPV16	Illum.-WGS	58.2	98.9	16196	58	250	3	4.96
GS18022	pos	HPV16	CGI-WGS	104	102.6	12543	109	244	0	4.84
GS18023	pos	HPV16	Illum.-WGS	50.2	107.9	10833	381	203	4	4.03
GS18026	pos	HPV16	CGI-WGS	100.2	99.4	11229	148	194	1	3.85
GS18027	pos	HPV16	Illum.-WGS	50.2	94.6	12992	23	184	0	3.65
GS18028	pos	HPV16	Illum.-WGS	47.3	103.4	10269	50	165	0	3.27
GS18029	pos	HPV16	Illum.-WGS	64.1	92.2	10283	117	164	4	3.25
GS18030	pos	HPV16	Illum.-WGS	52.3	102.6	9434	103	154	2	3.06
GS18031	pos	HPV16	Illum.-WGS	48.8	95.2	9646	25	153	0	3.04
GS18033	pos	HPV16	Illum.-WGS	54.2	101.7	9961	213	152	0	3.02
GS18034	pos	HPV16	CGI-WGS	97	96	8441	115	145	3	2.88
GS18035	pos	HPV16	CGI-WGS	92.4	90.7	10454	76	143	3	2.84
GS18036	pos	HPV16	Illum.-WGS	46.3	113.2	9275	437	142	8	2.82
GS18037	pos	HPV16	CGI-WGS	92.5	94	6745	24	134	0	2.66
GS18038	pos	HPV16	Illum.-WGS	44.7	100.7	8851	14	134	0	2.66
GS18039	pos	HPV33	Illum.-WGS	51.6	94.9	7798	132	134	1	2.66
GS18040	pos	HPV16	CGI-WGS	89.6	81.2	6309	87	127	2	2.52
GS18041	pos	HPV16	CGI-WGS	105.5	100.5	8779	337	126	3	2.5
GS18043	pos	HPV16	Illum.-WGS	46.9	94.3	5797	100	123	3	2.44
GS18044	pos	HPV16	Illum.-WGS	48.3	99.2	6693	117	122	1	2.42
GS18046	pos	HPV16	Illum.-WGS	49.1	97.6	6596	29	107	0	2.12
GS18047	pos	HPV16	Illum.-WGS	49	110.1	6967	23	102	0	2.02
GS18048	pos	HPV33	Illum.-WGS	48.4	100.7	5665	1	102	0	2.02
GS18049	pos	HPV16	Illum.-WGS	54.5	111.3	6497	144	99	1	1.96
GS18051	pos	HPV16	CGI-WGS	90.3	90.7	5818	74	94	1	1.87
GS18052	pos	HPV16	Illum.-WGS	52.6	103.3	4525	27	93	1	1.85
GS18053	pos	HPV16	Illum.-WGS	47.8	94.7	6317	203	93	6	1.85
GS18055	pos	HPV16	CGI-WGS	91.8	86.5	6314	63	92	1	1.83
GS18059	pos	HPV16	CGI-WGS	88.4	93.5	4551	148	87	5	1.73
GS18061	pos	HPV16	CGI-WGS	89.2	89.5	5241	94	84	4	1.67
GS18062	pos	HPV16	Illum.-WGS	51.8	129.9	6726	58	83	2	1.65
GS18063	pos	HPV16	Illum.-WGS	45.6	101.4	6315	38	82	2	1.63
GS18065	pos	HPV16	Illum.-WGS	49.1	109	5672	291	81	3	1.61
GS18066	pos	HPV16	Illum.-WGS	49.7	95.9	4429	4	79	0	1.57
GS18067	pos	HPV16	Illum.-WGS	57	132.4	4899	115	79	5	1.57
GS18068	pos	HPV16	Illum.-WGS	47.6	117.8	6747	31	75	0	1.49
GS18069	pos	HPV16	CGI-WGS	102.1	100.4	4361	66	72	1	1.43
GS18070	pos	HPV33	CGI-WGS	102.8	101.1	3469	130	72	3	1.43
GS18071	pos	HPV16	Illum.-WGS	55.7	114.2	4737	1	72	0	1.43
GS18072	pos	HPV35	CGI-WGS	96.7	95	3143	26	71	0	1.41
GS18074	pos	HPV16	Illum.-WGS	42	99	4210	21	62	0	1.23
GS18076	pos	HPV16	CGI-WGS	92	98.5	3213	52	61	0	1.21
GS18077	pos	HPV35	Illum.-WGS	60.5	120.1	3747	9	61	0	1.21
GS18078	pos	HPV16	CGI-WGS	102.6	102.8	3824	110	60	2	1.19
GS18079	pos	HPV16	Illum.-WGS	47.3	112.4	3430	116	55	5	1.09
GS18081	pos	HPV16	Illum.-WGS	46.4	99.3	4452	123	53	1	1.05
GS18082	pos	HPV16	CGI-WGS	99.1	97.4	2666	125	52	2	1.03
GS18085	pos	HPV59	Illum.-WGS	43.5	100	2238	1	50	0	0.99
GS18087	pos	HPV16	CGI-WGS	80.4	90.2	1950	39	45	0	0.89
GS18088	pos	HPV16	CGI-WGS	103.8	97.5	1573	49	44	0	0.87
GS18091	pos	HPV16	CGI-WGS	91.8	89.2	2433	50	42	0	0.83
GS18092	pos	HPV16	CGI-WGS	93.2	94.7	1975	73	42	1	0.83
GS18093	pos	HPV16	Illum.-WGS	55.7	110.8	2304	163	41	5	0.81
GS18094	pos	HPV16	CGI-WGS	94.9	88.3	1522	36	39	1	0.77
GS18095	pos	HPV16	CGI-WGS	99.1	95.7	2172	76	38	5	0.75
GS18096	pos	HPV16	CGI-WGS	89.5	89.6	2036	56	37	2	0.73
GS18097	pos	HPV16	Illum.-WGS	55	96.6	2181	97	37	4	0.73
GS18098	pos	HPV16	Illum.-WGS	48.6	105.9	2055	0	36	0	0.71
GS18099	pos	HPV16	Illum.-WGS	52.6	108.7	2242	4	34	0	0.67
GS18101	pos	HPV16	CGI-WGS	94.2	95.8	1419	45	31	4	0.62
GS18102	pos	HPV33	CGI-WGS	101.3	97.1	1448	14	26	0	0.52
GS18103	pos	HPV18	CGI-WGS	101.9	100.9	677	5	22	0	0.44
GS18105	pos	HPV18	CGI-WGS	95.2	88.1	1086	30	16	0	0.32
GS18107	pos	HPV69	CGI-WGS	84.9	89.6	644	11	13	0	0.26
GS18108	pos	HPV16	Illum.-WGS	46.7	94.4	534	8	13	0	0.26
GS18109	pos	HPV16	CGI-WGS	82.5	80.8	232	1	10	1	0.2
TCGA-BA-4077	pos	HPV16	TCGA-WGS	41.1	44.7	26063	397	508	9	10.08
TCGA-BA-5153	pos	HPV16	TCGA-WGS	41.8	38.6	3390	28	49	0	0.97
TCGA-BB-4225	pos	HPV33	TCGA-WGS	44.3	58.2	6230	116	118	1	2.34
TCGA-CN-4741	pos	HPV16	TCGA-WGS	46	46.1	13249	399	178	5	3.53
TCGA-CN-5374	pos	HPV16	TCGA-WGS	36.6	75.9	21923	82	284	1	5.64
TCGA-CR-5249	pos	HPV16	TCGA-WGS	37.2	67	3125	33	37	1	0.73
TCGA-CR-5250	pos	HPV16	TCGA-WGS	33.8	74.2	3806	133	62	3	1.23
TCGA-CR-6470	pos	HPV16	TCGA-WGS	44.1	42.7	3168	30	62	0	1.23
TCGA-CR-6472	pos	HPV16	TCGA-WGS	43.9	45.1	44330	636	873	6	17.32
TCGA-CR-6482	pos	HPV16	TCGA-WGS	37.1	68	4131	17	83	1	1.65
TCGA-CR-6487	pos	HPV16	TCGA-WGS	36.2	68	13613	37	232	0	4.6
TCGA-CR-7385	pos	HPV16	TCGA-WGS	44.5	39.6	4312	17	66	1	1.31
TCGA-CR-7404	pos	HPV16	TCGA-WGS	43.3	45.6	12532	19	195	0	3.87
TCGA-CV-5442	pos	HPV16	TCGA-WGS	36.3	67.7	28400	451	433	6	8.59
TCGA-CV-6433	pos	HPV16	TCGA-WGS	31	75.8	6149	293	80	3	1.59
TCGA-CV-6961	pos	HPV16	TCGA-WGS	52.2	46.7	47608	122	994	2	19.73
TCGA-CV-7100	pos	HPV33	TCGA-WGS	39.3	43.7	3117	81	24	2	0.48

## Sheet: S1D
Sample ID	HPV	HPV type	platform	normal coverage (x)	tumor coverage (x)	#SNVs (WGS)	#Indels (WGS)	#SNVs (exon)	#Indels (exon)	SNV rate in exon (per Mbp)
GS18024	neg	NA	Illum.-WGS	46.3	100.4	15629	46	198	2	3.93
GS18025	neg	NA	CGI-WGS	84.3	83.4	15864	476	197	13	3.91
GS18032	neg	NA	CGI-WGS	92.9	90	9576	150	152	1	3.02
GS18042	neg	NA	CGI-WGS	94	94.6	6791	157	124	4	2.46
GS18045	neg	NA	CGI-WGS	86.7	87.1	5418	89	108	4	2.14
GS18050	neg	NA	CGI-WGS	92	87.7	5784	126	97	0	1.92
GS18054	neg	NA	CGI-WGS	94.9	94.5	6662	146	92	2	1.83
GS18056	neg	NA	CGI-WGS	87.8	88.4	4450	71	91	3	1.81
GS18057	neg	NA	CGI-WGS	102.5	104.1	4130	102	90	9	1.79
GS18058	neg	NA	CGI-WGS	96.6	93.5	5295	111	88	7	1.75
GS18060	neg	NA	CGI-WGS	86.3	87.3	3671	45	86	1	1.71
GS18064	neg	NA	CGI-WGS	86.2	88	4223	63	81	2	1.61
GS18073	neg	NA	CGI-WGS	88.2	77.8	3758	137	64	3	1.27
GS18075	neg	NA	CGI-WGS	81.2	80	4621	74	61	1	1.21
GS18080	neg	NA	CGI-WGS	89.9	89.6	3670	58	54	0	1.07
GS18083	neg	NA	CGI-WGS	90.7	94	3615	87	50	1	0.99
GS18084	neg	NA	CGI-WGS	88.9	89.3	3874	49	50	1	0.99
GS18086	neg	NA	CGI-WGS	99.2	96.7	5182	76	45	1	0.89
GS18089	neg	NA	CGI-WGS	90.1	91.5	2743	98	43	3	0.85
GS18090	neg	NA	CGI-WGS	102.6	102	2541	115	43	4	0.85
GS18100	neg	NA	CGI-WGS	90.3	90.3	1459	29	31	1	0.62
GS18104	neg	NA	CGI-WGS	99.7	83.9	955	32	21	0	0.42
GS18106	neg	NA	CGI-WGS	88.8	88.1	748	23	13	1	0.26
GS18110	neg	NA	CGI-WGS	101.3	85.5	1606	15	8	0	0.16
GS18111	neg	NA	CGI-WGS	99.1	99.4	173	3	5	0	0.1
GS18112	neg	NA	CGI-WGS	87.8	87.4	169	9	4	0	0.08
TCGA-BA-5149	neg	NA	TCGA-WGS	40.4	67.8	17929	171	216	6	4.29
TCGA-BA-5556	neg	NA	TCGA-WGS	38.3	70.1	17895	15	219	0	4.35
TCGA-BA-6872	neg	NA	TCGA-WGS	40	73.9	25181	256	308	4	6.11
TCGA-BA-6873	neg	NA	TCGA-WGS	38.5	84.7	5588	99	105	2	2.08
TCGA-CN-4737	neg	NA	TCGA-WGS	35.7	82.3	5013	43	78	0	1.55
TCGA-CN-5365	neg	NA	TCGA-WGS	31.6	73.9	7674	94	94	2	1.87
TCGA-CN-6011	neg	NA	TCGA-WGS	42.9	73.2	52278	514	672	9	13.34
TCGA-CN-6994	neg	NA	TCGA-WGS	44.3	61	17621	267	239	3	4.74
TCGA-CQ-6225	neg	NA	TCGA-WGS	43.6	66	18810	1183	248	22	4.92
TCGA-CQ-6228	neg	NA	TCGA-WGS	41.6	72.4	13586	497	176	6	3.49
TCGA-CR-6467	neg	NA	TCGA-WGS	38.7	66.1	3567	132	76	3	1.51
TCGA-CR-6491	neg	NA	TCGA-WGS	42.8	68.9	17100	655	236	9	4.68
TCGA-CR-7382	neg	NA	TCGA-WGS	43.7	68.9	8579	2	147	0	2.92
TCGA-CR-7391	neg	NA	TCGA-WGS	39.2	45.4	393	0	3	0	0.06
TCGA-CV-5973	neg	NA	TCGA-WGS	40.3	70.7	7982	211	117	4	2.32
TCGA-CV-6956	neg	NA	TCGA-WGS	43	64.2	32697	671	388	11	7.7
TCGA-CV-7090	neg	NA	TCGA-WGS	30.3	79.1	6074	40	94	0	1.87
TCGA-CV-7180	neg	NA	TCGA-WGS	38.7	77.4	8726	25	111	1	2.2
TCGA-CV-7255	neg	NA	TCGA-WGS	30.1	77.1	10409	204	156	6	3.1
TCGA-CV-7416	neg	NA	TCGA-WGS	45.2	39.5	9187	315	121	1	2.4
TCGA-CV-7432	neg	NA	TCGA-WGS	42.4	67	28873	606	274	9	5.44
TCGA-CX-7086	neg	NA	TCGA-WGS	41.2	72.8	33543	528	462	10	9.17
TCGA-DQ-5625	neg	NA	TCGA-WGS	41.2	62	22901	165	362	4	7.18
TCGA-HD-7753	neg	NA	TCGA-WGS	44.6	61.6	14081	342	186	7	3.69

## Sheet: S1E
HPV type	WGS	WES	Total	%Total
HPV16	90	38	128	0.859
HPV18	2	0	2	0.013
HPV33	6	5	11	0.074
HPV35	3	3	6	0.04
HPV59	1	0	1	0.007
HPV69	1	0	1	0.007
Total	103	46	149	1

## Sheet: S1F
platform	HPV-positive	HPV-negative	total
Ohio - CGI WGS	34	25	59
Ohio - Illum. WGS	52	1	53
TCGA - WGS	17	24	41
TCGA - WES	46	285	331
total	149	335	484

## Sheet: S1G
sample ID	HPV16 (ISH)	p16 (IHC)	no. HPV16 copies per cell	no. HPV18 copies per cell	no. HPV33 copies per cell	no. HPV35 copies per cell	no. HPV59 copies per cell	HPV E6/E7 mRNA detection	line Blot	clinical test (HPV ISH)	clinical test (p16)	WGS platform	HPV type by WGS	RNA-seq
GS18001	pos	pos	81.3	NA	NA	NA	NA	pos	16*	pos	pos	Illum.	16	Y
GS18002	NA	NA	NA	NA	NA	NA	NA	NA	16*	pos	pos	Illum.	16	Y
GS18003	NA	NA	NA	NA	NA	NA	NA	NA	16*	pos	pos	Illum.	16	Y
GS18004	pos	pos	1	NA	NA	NA	NA	pos	16	pos	pos	CGI	16	Y
GS18005	NA	NA	NA	NA	NA	NA	NA	NA	16*	pos	pos	Illum.	16	Y
GS18006	pos	pos	124.8	NA	NA	NA	NA	pos	16	pos	pos	CGI	16	Y
GS18007	NA	NA	NA	NA	NA	NA	NA	NA	16*	pos	pos	Illum.	16	Y
GS18008	NA	NA	NA	NA	NA	NA	NA	NA	16*	pos	pos	Illum.	16	Y
GS18009	NA	NA	NA	NA	NA	NA	NA	NA	16*	pos	pos	Illum.	16	Y
GS18010	pos	pos	48.6	NA	NA	NA	NA	pos	16	pos	pos	Illum.	16	Y
GS18011	NA	NA	NA	NA	NA	NA	NA	NA	16*	pos	pos	Illum.	16	Y
GS18012	pos	pos	7.5	NA	NA	NA	NA	pos	16*	pos	pos	Illum.	16	Y
GS18013	NA	NA	NA	NA	NA	NA	NA	NA	16*	pos	pos	Illum.	16	Y
GS18014	pos	pos	1.1	NA	NA	NA	NA	pos	16	pos	pos	Illum.	16	Y
GS18015	pos	pos	5.4	NA	NA	NA	NA	pos	16	pos	pos	Illum.	16	Y
GS18016	pos	pos	59.6	NA	NA	NA	NA	pos	16	neg	pos	CGI	16	Y
GS18017	pos	pos	12	NA	NA	NA	NA	pos	16	pos	pos	Illum.	16	Y
GS18018	pos	pos	37.3	NA	NA	NA	NA	pos	16*	pos	pos	Illum.	16	Y
GS18019	pos	pos	21.9	NA	NA	NA	NA	pos	16	pos	pos	CGI	16	Y
GS18020	neg	pos	0	NA	NA	115.1	NA	pos	35	pos	pos	Illum.	35	Y
GS18021	neg	pos	0.2	NA	NA	NA	NA	pos	16	unknown	unknown	Illum.	16	Y
GS18022	NA	NA	NA	NA	NA	NA	NA	NA	16*	pos	pos	CGI	16	Y
GS18023	NA	NA	NA	NA	NA	NA	NA	NA	16*	unknown	pos	Illum.	16	Y
GS18026	pos	pos	747.4	NA	NA	NA	NA	pos	16	pos	pos	CGI	16	Y
GS18027	NA	NA	NA	NA	NA	NA	NA	NA	16*	pos	pos	Illum.	16	Y
GS18028	NA	NA	NA	NA	NA	NA	NA	NA	16*	pos	pos	Illum.	16	Y
GS18029	pos	pos	49.8	NA	NA	NA	NA	pos	16	pos	pos	Illum.	16	Y
GS18030	pos	pos	20.3	NA	NA	NA	NA	pos	16*	pos	pos	Illum.	16	Y
GS18031	pos	pos	9.5	NA	NA	NA	NA	NA	16	pos	pos	Illum.	16	Y
GS18033	pos	pos	3.6	NA	NA	NA	NA	pos	16	pos	pos	Illum.	16	Y
GS18034	pos	pos	29.9	NA	NA	NA	NA	pos	16	pos	pos	CGI	16	Y
GS18035	pos	pos	2	NA	NA	NA	NA	pos	16	pos	pos	CGI	16	Y
GS18036	NA	NA	NA	NA	NA	NA	NA	NA	16*	unknown	unknown	Illum.	16	Y
GS18037	pos	pos	38.3	NA	NA	NA	NA	pos	16	pos	pos	CGI	16	Y
GS18038	NA	NA	NA	NA	NA	NA	NA	NA	16*	pos	pos	Illum.	16	Y
GS18039	neg	pos	0	NA	0.7	NA	NA	pos	33	pos	pos	Illum.	33	Y
GS18040	pos	pos	12.2	NA	NA	NA	NA	pos	16	pos	pos	CGI	16	Y
GS18041	pos	pos	25.5	NA	NA	NA	NA	pos	16	unknown	unknown	CGI	16	Y
GS18043	pos	pos	76.4	NA	NA	NA	NA	pos	16	pos	pos	Illum.	16	Y
GS18044	NA	NA	NA	NA	NA	NA	NA	NA	16*	pos	pos	Illum.	16	Y
GS18046	pos	pos	33.1	NA	NA	NA	NA	pos	16	pos	pos	Illum.	16	Y
GS18047	NA	NA	NA	NA	NA	NA	NA	NA	16*	pos	pos	Illum.	16	Y
GS18048	pos	pos	0	NA	NA	NA	NA	neg	33*	pos	pos	Illum.	33	Y
GS18049	pos	pos	49.3	NA	NA	NA	NA	pos	16	pos	pos	Illum.	16	Y
GS18051	pos	pos	1.7	NA	NA	NA	NA	pos	16	pos	pos	CGI	16	Y
GS18052	pos	neg	27.1	NA	NA	NA	NA	pos	16	pos	neg	Illum.	16	Y
GS18053	pos	pos	10.1	NA	NA	NA	NA	pos	16	pos	pos	Illum.	16	Y
GS18055	pos	pos	23.5	NA	NA	NA	NA	pos	16	pos	pos	CGI	16	NA
GS18059	pos	pos	20.5	NA	NA	NA	NA	pos	16	pos	pos	CGI	16	Y
GS18061	pos	pos	18.6	NA	NA	NA	NA	pos	16	pos	pos	CGI	16	Y
GS18062	NA	NA	NA	NA	NA	NA	NA	NA	16*	pos	pos	Illum.	16	Y
GS18063	NA	NA	NA	NA	NA	NA	NA	NA	16*	pos	pos	Illum.	16	Y
GS18065	NA	NA	NA	NA	NA	NA	NA	NA	16*	pos	pos	Illum.	16	Y
GS18066	pos	pos	6.8	NA	NA	NA	NA	pos	16	pos	pos	Illum.	16	Y
GS18067	NA	NA	NA	NA	NA	NA	NA	NA	16*	pos	pos	Illum.	16	Y
GS18068	NA	NA	NA	NA	NA	NA	NA	NA	16*	pos	pos	Illum.	16	Y
GS18069	pos	pos	14.8	NA	NA	NA	NA	pos	16	pos	pos	CGI	16	Y
GS18070	pos	pos	0	NA	15.6	NA	NA	pos	33	pos	pos	CGI	33	Y
GS18071	NA	NA	NA	NA	NA	NA	NA	NA	16*	pos	pos	Illum.	16	Y
GS18072	neg	pos	0	NA	NA	5.3	NA	pos	35	pos	pos	CGI	35	Y
GS18074	pos	pos	5.1	NA	NA	NA	NA	pos	16*	pos	pos	Illum.	16	Y
GS18076	pos	pos	154.1	NA	NA	NA	NA	pos	16	pos	pos	CGI	16	Y
GS18077	NA	NA	NA	NA	NA	NA	NA	NA	35*	pos	pos	Illum.	35	NA
GS18078	pos	pos	14.9	NA	NA	NA	NA	pos	16	pos	pos	CGI	16	Y
GS18079	pos	pos	58.7	NA	NA	NA	NA	pos	16	pos	pos	Illum.	16	Y
GS18081	NA	NA	NA	NA	NA	NA	NA	NA	16*	pos	pos	Illum.	16	Y
GS18082	pos	pos	53.3	NA	NA	NA	NA	pos	16	pos	pos	CGI	16	Y
GS18085	neg	neg	0	NA	NA	NA	363.9	pos	59	neg	pos	Illum.	59	Y
GS18087	pos	pos	60.2	NA	NA	NA	NA	pos	16	pos	pos	CGI	16	Y
GS18088	pos	pos	9.2	NA	NA	NA	NA	pos	16	pos	pos	CGI	16	Y
GS18091	pos	pos	12.8	NA	NA	NA	NA	pos	16	unknown	pos	CGI	16	Y
GS18092	pos	pos	8.4	NA	NA	NA	NA	pos	16	pos	pos	CGI	16	Y
GS18093	pos	pos	2.7	NA	NA	NA	NA	pos	16	pos	pos	Illum.	16	Y
GS18094	NA	NA	NA	NA	NA	NA	NA	NA	16*	pos	pos	CGI	16	Y
GS18095	pos	pos	1.4	NA	NA	NA	NA	pos	16	pos	pos	CGI	16	Y
GS18096	pos	pos	18.7	NA	NA	NA	NA	pos	16	pos	pos	CGI	16	Y
GS18097	pos	pos	19.8	NA	NA	NA	NA	pos	16	pos	pos	Illum.	16	Y
GS18098	NA	NA	NA	NA	NA	NA	NA	NA	16*	pos	pos	Illum.	16	Y
GS18099	NA	NA	NA	NA	NA	NA	NA	NA	16	pos	pos	Illum.	16	Y
GS18101	pos	pos	9.8	NA	NA	NA	NA	pos	16	pos	pos	CGI	16	Y
GS18102	neg	pos	0	NA	3.2	NA	NA	pos	33	pos	pos	CGI	33	Y
GS18103	neg	pos	0	3	NA	NA	NA	pos	18	neg	pos	CGI	18	Y
GS18105	neg	pos	0	2391.7	NA	NA	NA	pos	18	pos	pos	CGI	18	Y
GS18107	neg	pos	0	NA	NA	NA	NA	NA	69	unknown	unknown	CGI	69	Y
GS18108	pos	pos	5.5	NA	NA	NA	NA	pos	16	pos	pos	Illum.	16	Y
GS18109	pos	pos	57.7	NA	NA	NA	NA	pos	16	pos	pos	CGI	16	Y
*LB was tested with fresh tumor DNA

## Sheet: S1H
sample ID	HPV16 (ISH)	p16 (IHC)	no. HPV16 copies / cell	HPV mRNA detection	line blot	clinical test (HPV ISH)	clinical test (p16)	WGS platform	comments
GS18024	NA	NA	NA	NA	16(2)*	unknown	neg	Illum.	low intensity band for LB
GS18025	neg	pos	0	neg	undetect	neg	pos	CGI
GS18032	neg	neg	0	neg	16(1)	unknown	neg	CGI	low intensity band for LB
GS18042	neg	neg	0	neg	undetect	unknown	neg	CGI
GS18045	neg	neg	0	neg	undetect	unknown	neg	CGI
GS18050	neg	neg	0	neg	undetect	unknown	neg	CGI
GS18054	neg	neg	0	neg	16(2)	neg	neg	CGI	low intensity band for LB
GS18056	neg	neg	0	neg	undetect	unknown	neg	CGI
GS18057	neg	neg	0	neg	undetect	unknown	neg	CGI
GS18058	neg	neg	0	neg	undetect	neg	neg	CGI
GS18060	neg	neg	0	neg	16(1)	neg	neg	CGI	low intensity band for LB
GS18064	neg	neg	0	neg	undetect	unknown	neg	CGI
GS18073	neg	neg	0	neg	undetect	neg	neg	CGI
GS18075	neg	neg	0	neg	undetect	unknown	neg	CGI
GS18080	neg	neg	0	neg	undetect	unknown	neg	CGI
GS18083	neg	neg	0	neg	undetect	unknown	neg	CGI
GS18084	neg	neg	0	neg	undetect	unknown	neg	CGI
GS18086	neg	neg	0	neg	undetect	neg	neg	CGI
GS18089	neg	neg	0	neg	undetect	unknown	neg	CGI
GS18090	neg	neg	0	neg	undetect	unknown	neg	CGI
GS18100	neg	neg	0	neg	undetect	unknown	neg	CGI
GS18104	neg	neg	0	neg	undetect	unknown	neg	CGI
GS18106	neg	neg	0	neg	undetect	neg	neg	CGI
GS18110	neg	pos	0	neg	undetect	neg	pos	CGI
GS18111	neg	neg	0	neg	undetect	neg	neg	CGI
GS18112	neg	neg	0	neg	16(2)	unknown	neg	CGI	low intensity band for LB

## Sheet: S1I
sample ID	HPV type	HPV coverage (x)	human genome coverage (x)	HPV copy no.	platform
GS18001	HPV16	77.67	107.81	0.72	Illum.
GS18002	HPV16	6308.74	108.27	58.27	Illum.
GS18003	HPV16	793.3	90.78	8.74	Illum.
GS18004	HPV16	103.88	94.64	1.1	CGI
GS18005	HPV16	180.63	92.32	1.96	Illum.
GS18006	HPV16	10561.1	99.15	106.52	CGI
GS18007	HPV16	28.37	139.6	0.2	Illum.
GS18008	HPV16	2731.41	104.73	26.08	Illum.
GS18009	HPV16	952.59	107.66	8.85	Illum.
GS18010	HPV16	807.82	102.25	7.9	Illum.
GS18011	HPV16	3398.2	98.28	34.58	Illum.
GS18012	HPV16	2346.97	104.71	22.41	Illum.
GS18013	HPV16	52.76	103.8	0.51	Illum.
GS18014	HPV16	110.47	99.11	1.11	Illum.
GS18015	HPV16	1227.98	101.09	12.15	Illum.
GS18016	HPV16	1501.41	108.96	13.78	CGI
GS18017	HPV16	745.35	99.18	7.52	Illum.
GS18018	HPV16	3958.21	107.5	36.82	Illum.
GS18019	HPV16	744.52	93.95	7.92	CGI
GS18020	HPV35	208.82	110.46	1.89	Illum.
GS18021	HPV16	42.1	98.92	0.43	Illum.
GS18022	HPV16	52.52	102.86	0.51	CGI
GS18023	HPV16	3494.15	107.85	32.4	Illum.
GS18026	HPV16	18184.1	99.89	182.05	CGI
GS18027	HPV16	36.33	94.58	0.38	Illum.
GS18028	HPV16	2992.76	103.37	28.95	Illum.
GS18029	HPV16	279.52	92.22	3.03	Illum.
GS18030	HPV16	4115.76	102.61	40.11	Illum.
GS18031	HPV16	652.46	95.17	6.86	Illum.
GS18033	HPV16	251.51	101.65	2.47	Illum.
GS18034	HPV16	1445.21	96.29	15.01	CGI
GS18035	HPV16	26.41	91.1	0.29	CGI
GS18036	HPV16	21.41	113.18	0.19	Illum.
GS18037	HPV16	1421.43	94.3	15.07	CGI
GS18038	HPV16	1121.09	100.66	11.14	Illum.
GS18039	HPV33	179.58	94.93	1.89	Illum.
GS18040	HPV16	926.67	81.58	11.36	CGI
GS18041	HPV16	558.98	100.96	5.54	CGI
GS18043	HPV16	231.19	94.33	2.45	Illum.
GS18044	HPV16	1591.87	99.18	16.05	Illum.
GS18046	HPV16	3928.29	97.55	40.27	Illum.
GS18047	HPV16	9168.65	110.1	83.27	Illum.
GS18048	HPV33	104.12	100.65	1.03	Illum.
GS18049	HPV16	3128.92	111.31	28.11	Illum.
GS18051	HPV16	77.29	91.26	0.85	CGI
GS18052	HPV16	6.74	103.32	0.07	Illum.
GS18053	HPV16	1680.24	94.73	17.74	Illum.
GS18055	HPV16	2652.25	86.84	30.54	CGI
GS18059	HPV16	4849.33	93.91	51.64	CGI
GS18061	HPV16	36.96	89.82	0.41	CGI
GS18062	HPV16	1274.72	129.93	9.81	Illum.
GS18063	HPV16	90.58	101.45	0.89	Illum.
GS18065	HPV16	1642.39	109.05	15.06	Illum.
GS18066	HPV16	483.01	95.93	5.04	Illum.
GS18067	HPV16	2738.02	132.37	20.68	Illum.
GS18068	HPV16	97.9	117.85	0.83	Illum.
GS18069	HPV16	169.1	100.87	1.68	CGI
GS18070	HPV33	919.27	101.44	9.06	CGI
GS18071	HPV16	3251.74	114.2	28.47	Illum.
GS18072	HPV35	59.28	95.35	0.62	CGI
GS18074	HPV16	1069.76	99.03	10.8	Illum.
GS18076	HPV16	2498.92	98.87	25.27	CGI
GS18077	HPV35	3991.91	120.13	33.23	Illum.
GS18078	HPV16	153.63	103.05	1.49	CGI
GS18079	HPV16	146.24	112.37	1.3	Illum.
GS18081	HPV16	778.46	99.29	7.84	Illum.
GS18082	HPV16	3294.09	97.72	33.71	CGI
GS18085	HPV59	999.06	100.03	9.99	Illum.
GS18087	HPV16	833.84	90.5	9.21	CGI
GS18088	HPV16	439.58	98.05	4.48	CGI
GS18091	HPV16	923.98	89.63	10.31	CGI
GS18092	HPV16	554.17	94.89	5.84	CGI
GS18093	HPV16	847.8	110.83	7.65	Illum.
GS18094	HPV16	493.11	88.65	5.56	CGI
GS18095	HPV16	1361.4	96.13	14.16	CGI
GS18096	HPV16	4648.26	89.99	51.66	CGI
GS18097	HPV16	37.63	96.57	0.39	Illum.
GS18098	HPV16	1722.18	105.91	16.26	Illum.
GS18099	HPV16	585.24	108.73	5.38	Illum.
GS18101	HPV16	1185.18	96.28	12.31	CGI
GS18102	HPV33	739.38	97.61	7.58	CGI
GS18103	HPV18	59.06	101.2	0.58	CGI
GS18105	HPV18	54.11	88.51	0.61	CGI
GS18107	HPV69	11.12	89.99	0.12	CGI
GS18108	HPV16	896.56	94.39	9.5	Illum.
GS18109	HPV16	2438.13	81.11	30.06	CGI
TCGA-BA-4077	HPV16	665.15	44.23	15.04	TCGA
TCGA-BA-5153	HPV16	810.28	38.21	21.21	TCGA
TCGA-BB-4225	HPV33	1015.21	57.67	17.6	TCGA
TCGA-CN-4741	HPV16	975.29	45.66	21.36	TCGA
TCGA-CN-5374	HPV16	1052.93	75.2	14	TCGA
TCGA-CR-5249	HPV16	1151.03	66.37	17.34	TCGA
TCGA-CR-5250	HPV16	419.39	74.78	5.61	TCGA
TCGA-CR-6470	HPV16	269.64	42.32	6.37	TCGA
TCGA-CR-6472	HPV16	34.83	44.65	0.78	TCGA
TCGA-CR-6482	HPV16	16618.8	67.31	246.9	TCGA
TCGA-CR-6487	HPV16	562.68	67.31	8.36	TCGA
TCGA-CR-7385	HPV16	620.48	39.24	15.81	TCGA
TCGA-CR-7404	HPV16	3206.81	45.18	70.97	TCGA
TCGA-CV-5442	HPV16	96.1	67	1.43	TCGA
TCGA-CV-6433	HPV16	2252.19	75.09	29.99	TCGA
TCGA-CV-6961	HPV16	205.29	46.22	4.44	TCGA
TCGA-CV-7100	HPV33	1344.14	43.3	31.04	TCGA

## Sheet: S1J
HPV copy number range	Freq	Percent
0.1-0.3	3	0.0291
0.3-1	13	0.1262
2018-01-03	9	0.0874
2018-03-10	23	0.2233
2018-10-30	32	0.3107
30-100	20	0.1942
>=100	3	0.0291
total	103	1

[truncated: 12 more sheets: S1K, S1L, S1M, S1N, S1O, S1P, S1Q, S1R, S1S, S1T, S1U, S1V]
