# Supplementary material for: Human papillomavirus and the landscape of secondary genetic alterations in oral cancers
Source: HighWire-hosted journal article supplement (doi:10.1101/gr.241141.118), 2018-12-18
Supplement: Supplemental_Table_S2.xlsx [file Supplemental_Table_S2.xlsx]

## Sheet: S2A
pattern	mean fraction of HPV-positive samples (%total)	mean fraction of HPV-negative samples (%total)	difference	p-value	FDR adjusted p-value
C>A	10.1	13.38	-3.28	1.53e-10	4.6e-10	*
C>G	16.81	15.25	1.55	0.124	0.124
C>T	59.15	51.04	8.12	1.23e-16	7.39e-16	*
T>A	3.45	5.47	-2.02	3.69e-10	7.38e-10	*
T>C	8.18	11.47	-3.29	3.15e-07	4.73e-07	*
T>G	2.31	3.4	-1.09	4.82e-05	5.79e-05	*

## Sheet: S2B
pattern	mean fraction of HPV-positive samples (%total)	mean fraction of HPV-negative samples (%total)	difference	p-value	FDR adjusted p-value
C>A	12.6	18.28	-5.68	5.72e-13	1.72e-12	*
C>G	18.58	14.81	3.77	0.00458	0.00458	*
C>T	49.04	36.44	12.6	3e-16	1.8e-15	*
T>A	5.28	9.67	-4.39	4.13e-12	8.27e-12	*
T>C	11.15	15.25	-4.1	4.94e-05	5.92e-05	*
T>G	3.35	5.54	-2.2	8.37e-12	1.26e-11	*

## Sheet: S2C
96 patterns of tri-nucleotide substitute patterns	mean fraction of HPV-positive samples (%total)	mean fraction of HPV-negative samples (%total)	difference	P-value	FDR adjusted p-value
C>T in T*A	13.39	5.49	7.9	2.22e-14	7.1e-13	*
C>T in T*T	7.91	4.17	3.75	5.46e-14	1.31e-12	*
C>T in T*G	3.56	2.28	1.28	1.44e-12	1.98e-11	*
T>C in A*A	1.06	2.49	-1.43	2.06e-11	1.97e-10	*
C>G in T*A	6.17	3.68	2.49	6.7e-05	0.000105	*
C>G in T*T	7.48	4.97	2.51	0.000227	0.00033	*
T>C in T*G	1.56	0.56	1	0.00243	0.00307	*

## Sheet: S2D
96 tri-nucleotide substitution pattern	mean fraction of HPV-positive samples (%total)	mean fraction of HPV-negative samples (%total)	Difference	P-value	adjusted p-value
C>T in T*G	8.01	5.5	2.51	7.87e-12	3.67e-10	*
C>T in T*T	6.7	3.87	2.84	1.15e-11	3.67e-10	*
C>T in T*A	10.85	5.94	4.91	1.74e-11	4.17e-10	*
C>G in T*T	5.97	4.82	1.15	0.0222	0.0608
C>G in T*A	4.76	3.89	0.87	0.0429	0.103

## Sheet: S2E
signature	signature fraction					number of signature SNVs
	mean fraction of HPV-positive samples (%total)	mean fraction of HPV-negative samples (%total)	P-value	FDR-adjusted p-value		mean number of SNVs in HPV-positive samples	mean number of SNVs in HPV-negative samples	P-value	FDR-adjusted p-value
Sig1	0.2183	0.1611	0.00717	0.0179	*	1325.21	944.78	0.0464	0.102
Sig2	0.2606	0.0811	2.92e-16	8.76e-15	*	5230.19	1055	1.71e-05	0.000171	*
Sig3	0.0352	0.0725	0.00202	0.00606	*	213.78	788.66	0.000476	0.00204	*
Sig4	0.0032	0.0154	0.0498	0.0996		25.44	184.14	0.212	0.353
Sig5	0.0926	0.1042	0.522	0.59		651.19	1162.96	0.18	0.337
Sig6	0.0074	0.0045	0.156	0.275		45.36	29.42	0.0133	0.0337	*
Sig7	0.01	0.0159	0.198	0.33		98.79	115.82	0.577	0.641
Sig8	0.0456	0.1059	1.99e-05	0.000149	*	355.75	1457.52	0.00017	0.00128	*
Sig9	0.0102	0.03	6.1e-05	0.000366	*	79.28	314.98	0.0113	0.0337	*
Sig10	0.0117	0.0061	0.000395	0.00197	*	133.5	70.96	0.0499	0.102
Sig11	0.0113	0.0276	8.13e-07	8.13e-06	*	66.79	299	1.85e-07	2.77e-06	*
Sig12	0.0285	0.0048	0.00281	0.00767	*	216.06	25.08	0.000333	0.002	*
Sig13	0.1687	0.1078	0.00138	0.0046	*	3848.83	1384.46	0.436	0.523
Sig14	0.0019	0.0084	0.00134	0.0046	*	13.13	51.12	0.000435	0.00204	*
Sig15	0.0115	0.0164	0.263	0.395		66.99	66.24	0.689	0.738
Sig16	0.0183	0.1415	3.36e-08	5.05e-07	*	106.08	1456.94	6.55e-08	1.96e-06	*
Sig17	0.002	0.0012	0.628	0.66		35.19	6.32	0.424	0.523
Sig18	0.0318	0.0608	0.00138	0.0046	*	191.61	456.24	0.000546	0.00205	*
Sig19	0.0048	0.006	0.638	0.66		18.58	43.2	0.197	0.348
Sig20	0.0067	0.0001	0.0172	0.0397	*	60.23	1.26	0.0135	0.0337	*
Sig21	0.0055	0.0022	0.0561	0.105		42.14	14.18	0.37	0.504
Sig22	0.0001	0.0006	0.324	0.426		0.53	1.9	0.33	0.485
Sig23	0.0002	0.0008	0.445	0.556		1.08	8.54	0.563	0.641
Sig24	0.0016	0.0012	0.714	0.714		17.26	1.1	0.00217	0.00723	*
Sig25	0.0021	0.0072	0.0222	0.0476	*	20.9	124.92	0.0511	0.102
Sig26	0.0018	0.0031	0.475	0.571		20.76	18.62	0.809	0.837
Sig27	0.0001	0.0006	0.327	0.426		0.89	5.18	0.34	0.485
Sig28	0.0014	0.0026	0.29	0.414		10.43	12.06	0.227	0.358
Sig29	0.0033	0.0059	0.232	0.367		35.49	24.64	0.997	0.997
Sig30	0.0036	0.0049	0.531	0.59		40.85	41.46	0.401	0.523

## Sheet: S2F
signature	signature fraction					number of signature SNVs
	mean fraction of HPV-positive samples (%total)	mean fraction of HPV-negative samples (%total)	P-value	FDR-adjusted p-value		mean number of SNVs in HPV-positive samples	mean number of SNVs in HPV-negative samples	P-value	FDR-adjusted p-value
Sig1	0.1603	0.1443	0.263	0.393		16.07	17.32	0.06	0.12
Sig2	0.2561	0.1105	4.48e-15	1.34e-13	*	87.71	22.48	2.7e-07	4.05e-06	*
Sig3	0.0392	0.0504	0.206	0.354		4.92	7.02	0.0296	0.0925
Sig4	0.0029	0.0092	0.0296	0.178		0.11	2.57	0.00086	0.00516	*
Sig5	0.0378	0.0579	0.041	0.205		3.94	8.1	0.0794	0.149
Sig6	0.0161	0.0133	0.5	0.577		1.53	2.5	0.662	0.759
Sig7	0.0313	0.0283	0.547	0.608		6.21	8.97	0.126	0.2
Sig8	0.0225	0.0273	0.45	0.567		2.47	4.21	0.109	0.192
Sig9	0.0101	0.0071	0.456	0.567		0.67	0.8	0.733	0.759
Sig10	0.019	0.0149	0.185	0.354		3.44	2.03	0.155	0.231
Sig11	0.0136	0.0191	0.128	0.354		1.52	5.04	0.0157	0.0608
Sig12	0.0184	0.0092	0.0923	0.346		1.93	1.34	0.341	0.426
Sig13	0.1572	0.1356	0.169	0.354		66.53	27.68	0.732	0.759
Sig14	0.0024	0.0053	0.0482	0.207		0.27	1.07	0.0453	0.113
Sig15	0.0101	0.0112	0.677	0.725		0.81	1.77	0.039	0.106
Sig16	0.0785	0.2048	5.73e-11	8.59e-10	*	7.4	30.36	1.5e-12	4.51e-11	*
Sig17	0.0034	0.0056	0.252	0.393		0.25	0.49	0.267	0.349
Sig18	0.0099	0.0224	0.00137	0.0103	*	0.95	2.6	0.000188	0.00141	*
Sig19	0.0064	0.0186	0.000435	0.00435	*	0.54	2.57	1.58e-06	1.58e-05	*
Sig20	0.0095	0.0063	0.302	0.411		0.85	1.16	0.213	0.291
Sig21	0.0118	0.0175	0.194	0.354		1.01	7.23	0.052	0.12
Sig22	0.0031	0.0044	0.275	0.393		0.33	0.56	0.119	0.199
Sig23	0.0041	0.0045	0.846	0.846		0.26	0.55	0.161	0.231
Sig24	0.0074	0.0065	0.761	0.787		0.76	0.66	0.72	0.759
Sig25	0.0049	0.0081	0.212	0.354		0.28	1.08	0.00549	0.0275	*
Sig26	0.0108	0.0165	0.109	0.354		0.93	5.97	0.0308	0.0925
Sig27	0.0054	0.004	0.472	0.567		0.32	0.59	0.058	0.12
Sig28	0.0089	0.0053	0.166	0.354		0.74	0.58	0.503	0.604
Sig29	0.0059	0.0091	0.179	0.354		0.54	1.09	0.0162	0.0608
Sig30	0.0329	0.0226	0.162	0.354		2.07	2.91	0.83	0.83

## Sheet: S2G
signature	signature fraction				number of signature SNVs
	correlation coefficient	p-value	FDR-adjusted p-value		correlation coefficient	p-value	FDR-adjusted p-value
Sig1	-0.62	3.47e-12	5.2e-11	*	0.04	0.72	0.888
Sig2	0.6	1.59e-11	1.59e-10	*	0.91	2.75e-40	8.25e-39	*
Sig3	-0.25	0.0112	0.0304	*	-0.23	0.0211	0.0791
Sig4	-0.08	0.43	0.645		0.11	0.271	0.542
Sig5	-0.38	8.55e-05	0.000576	*	-0.1	0.333	0.588
Sig6	-0.19	0.0586	0.146		0.05	0.589	0.842
Sig7	-0.29	0.00342	0.0103	*	0.29	0.00273	0.0205	*
Sig8	-0.15	0.143	0.329		-0.08	0.419	0.698
Sig9	-0.09	0.364	0.584		0.06	0.58	0.842
Sig10	-0.09	0.37	0.584		0.24	0.0164	0.0791
Sig11	-0.32	0.0011	0.00414	*	-0.12	0.21	0.485
Sig12	-0.02	0.844	0.909		0.01	0.944	0.944
Sig13	0.68	2.91e-15	8.74e-14	*	0.75	4.19e-20	6.28e-19	*
Sig14	-0.13	0.183	0.366		0.04	0.671	0.888
Sig15	-0.36	0.000191	0.000954	*	-0.03	0.732	0.888
Sig16	-0.32	0.000854	0.00366	*	-0.14	0.15	0.417
Sig17	0.11	0.264	0.495		0.14	0.167	0.417
Sig18	-0.37	9.6e-05	0.000576	*	-0.11	0.248	0.531
Sig19	-0.31	0.00128	0.00428	*	-0.3	0.00228	0.0205	*
Sig20	0.04	0.66	0.824		0.03	0.74	0.888
Sig21	-0.02	0.864	0.909		0.02	0.87	0.941
Sig22	-0.01	0.909	0.909		-0.01	0.909	0.941
Sig23	-0.01	0.909	0.909		-0.01	0.909	0.941
Sig24	-0.09	0.364	0.584		0.23	0.0195	0.0791
Sig25	0.06	0.548	0.721		0.15	0.128	0.417
Sig26	0.07	0.456	0.651		0.08	0.449	0.709
Sig27	-0.01	0.909	0.909		-0.01	0.909	0.941
Sig28	-0.14	0.155	0.333		-0.14	0.163	0.417
Sig29	0.02	0.858	0.909		0.25	0.0118	0.0708
Sig30	0.06	0.553	0.721		0.1	0.319	0.588

## Sheet: S2H
signature	signature fraction				number of signature SNVs
	correlation coefficient	p-value	FDR-adjusted p-value		correlation coefficient	p-value	FDR-adjusted p-value
Sig1	-0.38	1.95e-06	1.95e-05	*	0	0.977	0.999
Sig2	0.63	4.92e-18	7.38e-17	*	0.89	1.48e-51	4.43e-50	*
Sig3	-0.09	0.28	0.324		0.09	0.301	0.608
Sig4	-0.17	0.0409	0.0818		-0.14	0.0901	0.386
Sig5	-0.22	0.00655	0.0327	*	0	0.994	0.999
Sig6	-0.18	0.0308	0.0802		0.04	0.655	0.786
Sig7	-0.1	0.247	0.296		0.43	3.19e-08	2.39e-07	*
Sig8	-0.13	0.101	0.144		0	0.999	0.999
Sig9	-0.23	0.00504	0.0302	*	-0.08	0.304	0.608
Sig10	-0.02	0.827	0.827		0.44	2.28e-08	2.28e-07	*
Sig11	-0.18	0.0311	0.0802		0.1	0.206	0.548
Sig12	-0.07	0.379	0.406		-0.06	0.461	0.702
Sig13	0.7	1.48e-23	4.45e-22	*	0.83	6.64e-40	9.95e-39	*
Sig14	-0.11	0.165	0.215		0.06	0.434	0.702
Sig15	-0.18	0.0321	0.0802		-0.1	0.237	0.548
Sig16	-0.2	0.0155	0.0664		-0.08	0.336	0.629
Sig17	-0.13	0.11	0.15		-0.1	0.224	0.548
Sig18	-0.14	0.0951	0.144		0	0.985	0.999
Sig19	-0.1	0.238	0.296		-0.05	0.515	0.702
Sig20	-0.14	0.0995	0.144		-0.04	0.61	0.762
Sig21	-0.18	0.031	0.0802		-0.02	0.852	0.983
Sig22	-0.05	0.552	0.571		-0.04	0.598	0.762
Sig23	-0.19	0.0204	0.0766		-0.1	0.221	0.548
Sig24	-0.16	0.0464	0.087		0.12	0.133	0.442
Sig25	-0.17	0.0372	0.0818		-0.13	0.112	0.42
Sig26	-0.16	0.0495	0.0874		-0.05	0.511	0.702
Sig27	-0.17	0.0384	0.0818		-0.15	0.0697	0.348
Sig28	-0.14	0.0845	0.141		-0.07	0.381	0.672
Sig29	-0.08	0.331	0.368		-0.06	0.468	0.702
Sig30	-0.33	4.73e-05	0.000354	*	-0.2	0.0135	0.0812

## Sheet: S2I
signature	signature fraction				number of signature SNVs
	correlation coefficient	p-value	FDR-adjusted p-value		correlation coefficient	p-value	FDR-adjusted p-value
Sig1	-0.62	1.79e-06	2.69e-05	*	0.23	0.104	0.261
Sig2	0.22	0.12	0.332		0.89	1.27e-17	3.82e-16	*
Sig3	0.14	0.323	0.57		0.22	0.119	0.276
Sig4	0.15	0.285	0.565		0.15	0.29	0.538
Sig5	0.12	0.423	0.578		0.28	0.0513	0.14
Sig6	-0.12	0.397	0.578		0	0.993	0.993
Sig7	-0.16	0.258	0.553		0.21	0.143	0.306
Sig8	0.5	0.000202	0.00202	*	0.75	5.15e-10	5.15e-09	*
Sig9	0.22	0.122	0.332		0.44	0.00158	0.00788	*
Sig10	0.23	0.103	0.332		0.45	0.00118	0.00709	*
Sig11	0.23	0.108	0.332		0.72	3.68e-09	2.76e-08	*
Sig12	-0.21	0.147	0.369		-0.08	0.565	0.795
Sig13	0.1	0.5	0.625		0.77	4.97e-11	7.46e-10	*
Sig14	-0.12	0.424	0.578		0.07	0.61	0.795
Sig15	-0.67	8.66e-08	2.6e-06	*	-0.08	0.579	0.795
Sig16	0.06	0.685	0.761		0.4	0.00452	0.0194	*
Sig17	-0.01	0.92	0.936		-0.01	0.92	0.951
Sig18	-0.15	0.301	0.565		0.3	0.0369	0.111
Sig19	-0.14	0.342	0.57		0.08	0.588	0.795
Sig20	0.12	0.422	0.578		0.12	0.422	0.703
Sig21	-0.1	0.481	0.625		0.09	0.543	0.795
Sig22	-0.19	0.186	0.43		-0.05	0.741	0.856
Sig23	0.07	0.644	0.743		0.07	0.644	0.805
Sig24	-0.38	0.00621	0.0373	*	-0.31	0.026	0.0865
Sig25	0.34	0.0172	0.0859		0.35	0.0139	0.0522
Sig26	-0.09	0.526	0.632		-0.03	0.852	0.913
Sig27	-0.01	0.936	0.936		0.03	0.852	0.913
Sig28	-0.3	0.0342	0.147		-0.05	0.731	0.856
Sig29	-0.38	0.00598	0.0373	*	-0.15	0.289	0.538
Sig30	0.03	0.815	0.873		0.15	0.305	0.538

## Sheet: S2J
signature	signature fraction				number of signature SNVs
	correlation coef	p-value	FDR-adjusted p-value		correlation coef	p-value	FDR-adjusted p-value
Sig1	-0.31	1.18e-08	1.18e-07	*	0.19	0.000539	0.00269	*
Sig2	0.41	5.2e-15	1.56e-13	*	0.58	8.9e-32	2.67e-30	*
Sig3	-0.07	0.225	0.378		0.12	0.0245	0.049	*
Sig4	0.12	0.0295	0.0919		0.2	0.000251	0.00151	*
Sig5	0.01	0.856	0.886		0.06	0.313	0.409
Sig6	-0.12	0.0306	0.0919		0.12	0.0224	0.0481	*
Sig7	-0.05	0.334	0.478		0.23	2.09e-05	0.000209	*
Sig8	0.04	0.426	0.535		0.13	0.0158	0.0365	*
Sig9	-0.07	0.182	0.341		0.01	0.805	0.805
Sig10	-0.04	0.514	0.617		0.18	0.00083	0.00356	*
Sig11	-0.01	0.906	0.906		0.17	0.0013	0.00488	*
Sig12	-0.02	0.739	0.821		0.1	0.0604	0.113
Sig13	0.39	1.3e-13	1.95e-12	*	0.52	1.97e-24	2.95e-23	*
Sig14	0.05	0.391	0.534		0.15	0.00691	0.0207	*
Sig15	-0.1	0.0746	0.172		0.14	0.00994	0.0271	*
Sig16	0.01	0.834	0.886		0.22	4.69e-05	0.000352	*
Sig17	-0.22	3.96e-05	0.000238	*	-0.07	0.176	0.24
Sig18	-0.21	0.000125	0.000625	*	0.05	0.399	0.498
Sig19	-0.06	0.251	0.378		0.07	0.176	0.24
Sig20	-0.06	0.252	0.378		0.08	0.126	0.199
Sig21	-0.19	0.000398	0.0017	*	0.14	0.0118	0.0294	*
Sig22	-0.07	0.232	0.378		0.03	0.631	0.653
Sig23	-0.14	0.0125	0.0469	*	0.03	0.578	0.62
Sig24	-0.26	1.55e-06	1.16e-05	*	0.03	0.569	0.62
Sig25	-0.09	0.115	0.246		0.09	0.105	0.175
Sig26	0.04	0.428	0.535		0.15	0.00496	0.0165	*
Sig27	0.02	0.718	0.821		0.1	0.0733	0.129
Sig28	-0.11	0.0488	0.133		-0.04	0.455	0.525
Sig29	-0.11	0.0538	0.135		0.04	0.422	0.506
Sig30	-0.08	0.124	0.249		0.08	0.144	0.216

[truncated: 5 more sheets: S2K, S2L, S2M, S2N, S2O]
