# Supplementary material for: Human papillomavirus and the landscape of secondary genetic alterations in oral cancers
Source: HighWire-hosted journal article supplement (doi:10.1101/gr.241141.118), 2018-12-18
Supplement: Supplemental_Table_S3.xlsx [file Supplemental_Table_S3.xlsx]

## Sheet: S3A
gene	description	#variants with coding change	#unique variants with coding change	#synony-mous variants	#patients with coding change variant	p	q
FGFR3	fibroblast growth factor receptor 3	19	7	2	17	0	0
NFKBIA	Nuclear Factor Of Kappa Light Polypeptide Gene Enhancer In B-Cells Inhibitor, Alpha	4	4	0	4	0	0
PIK3CA	phosphatidylinositol-4,5-bisphosphate 3-kinase, catalytic subunit alpha	45	9	0	42	1.46e-13	9.17e-10
PTEN	phosphatase and tensin homolog	13	12	0	13	4.55e-11	2.14e-07
KMT2D	lysine (K)-specific methyltransferase 2D	22	22	4	20	2.52e-09	9.51e-06
CYLD	cylindromatosis (turban tumor syndrome)	11	11	1	11	4.45e-09	1.4e-05
RB1	retinoblastoma 1	10	10	0	9	8.22e-09	2.21e-05
DDX3X	DEAD (Asp-Glu-Ala-Asp) box helicase 3, X-linked	9	8	0	8	2.74e-08	6.45e-05
ZNF750	zinc finger protein 750	23	22	1	21	7.08e-07	0.00148
IFNGR1	Interferon Gamma Receptor 1	4	4	0	4	7.82e-07	0.00148
EP300	E1A Binding Protein P300	18	12	0	18	1.63e-06	0.00279
FBXW7	F-box and WD repeat domain containing 7, E3 ubiquitin protein ligase	11	7	0	11	2e-06	0.00314
CASZ1	castor zinc finger 1	15	14	2	14	3.06e-06	0.00444
TRAF3	TNF receptor-associated factor 3	5	5	0	5	1.05e-05	0.0133
RBL1	Retinoblastoma-Like 1	9	9	0	9	3.01e-05	0.0355
TAF5	TAF5 RNA polymerase II, TATA box binding protein (TBP)-associated factor, 100kDa	5	5	0	4	7.08e-05	0.0703
RIPK4	receptor interacting serine/threonine kinase 4	6	6	0	6	8.17e-05	0.077
HIST1H2AE	histone cluster 1 H2A family member e	4	4	0	4	0.000177	0.143
STAT1	signal transducer and activator of transcription 1	4	4	1	4	0.000182	0.143
NSD1	Nuclear Receptor Binding SET Domain Protein 1	10	10	1	10	0.000241	0.163
ASAP1	ArfGAP with SH3 domain, ankyrin repeat and PH domain 1	10	10	0	9	0.000221	0.163
BBX	BBX, HMG-box containing	12	12	2	5	0.000231	0.163
SLTM	SAFB like transcription modulator	6	6	0	5	0.000233	0.163
TGFBR2	transforming growth factor beta receptor 2	5	5	0	5	0.000283	0.184

## Sheet: S3B
gene1	gene2	#sample mutated in gene1	#sample mutated in gene2	#sample mutated in both gene1 and gene2	#total sample	#expected	fold increase	p-value	FDR adjusted p-value
ZNF750	DDX3X	21	8	6	149	1.13	5.32	9.17e-05	0.0253	*
ZNF750	NSD1	21	10	6	149	1.41	4.26	0.000568	0.0784
ZNF750	ASAP1	21	9	5	149	1.27	3.94	0.00303	0.178
ZNF750	FGFR3	21	17	7	149	2.4	2.92	0.00321	0.178
FGFR3	FBXW7	17	11	5	149	1.26	3.98	0.00323	0.178
FGFR3	STAT1	17	4	3	149	0.46	6.57	0.00467	0.215
CASZ1	BBX	14	5	3	149	0.47	6.39	0.006	0.236
ASAP1	DDX3X	9	8	3	149	0.48	6.21	0.00744	0.257
EP300	PTEN	18	13	5	149	1.57	3.18	0.0102	0.299
FGFR3	BBX	17	5	3	149	0.57	5.26	0.0108	0.299
EP300	BBX	18	5	3	149	0.6	4.97	0.0129	0.323
DDX3X	IFNGR1	8	4	2	149	0.21	9.31	0.0144	0.332
RBL1	IFNGR1	9	4	2	149	0.24	8.28	0.0184	0.35
RBL1	STAT1	9	4	2	149	0.24	8.28	0.0184	0.35
ZNF750	BBX	21	5	3	149	0.7	4.26	0.0203	0.35
ZNF750	TGFBR2	21	5	3	149	0.7	4.26	0.0203	0.35
ZNF750	RBL1	21	9	4	149	1.27	3.15	0.0233	0.379
CASZ1	DDX3X	14	8	3	149	0.75	3.99	0.0282	0.404
ZNF750	CASZ1	21	14	5	149	1.97	2.53	0.0294	0.404
RBL1	BBX	9	5	2	149	0.3	6.62	0.0296	0.404
PIK3CA	KMT2D	42	20	10	149	5.64	1.77	0.0307	0.404
NSD1	TGFBR2	10	5	2	149	0.34	5.96	0.0365	0.458
CASZ1	RBL1	14	9	3	149	0.85	3.55	0.0399	0.467
RBL1	RIPK4	9	6	2	149	0.36	5.52	0.043	0.467
FBXW7	TRAF3	11	5	2	149	0.37	5.42	0.044	0.467
FBXW7	BBX	11	5	2	149	0.37	5.42	0.044	0.467

## Sheet: S3C
gene	description	#variants with coding change	#unique variants with coding change	#synony-mous variants	#patients with coding change variant	p	q
TP53	tumor protein p53	324	208	2	267	0	0
FAT1	FAT atypical cadherin 1	119	111	8	91	0	0
CASP8	caspase 8	60	51	0	52	0	0
HRAS	Harvey rat sarcoma viral oncogene homolog	30	12	0	28	0	0
TGFBR2	transforming growth factor beta receptor II	19	15	2	18	0	0
HLA-B	major histocompatibility complex, class I, B	19	16	1	17	0	0
CDKN2A	cyclin-dependent kinase inhibitor 2A	86	36	1	83	2.89e-15	7.78e-12
AJUBA	ajuba LIM protein	20	18	2	17	8.72e-13	2.06e-09
PIK3CA	phosphatidylinositol-4,5-bisphosphate 3-kinase catalytic subunit alpha	52	25	1	51	1.14e-12	2.38e-09
NOTCH1	notch 1	72	71	7	64	2.8e-12	5.28e-09
EPHA2	EPH receptor A2	21	18	2	17	1.01e-09	1.58e-06
FBXW7	F-box and WD repeat domain containing 7	24	21	0	22	8.58e-09	1.24e-05
NSD1	nuclear receptor binding SET domain protein 1	31	31	0	27	2.81e-08	3.78e-05
RASA1	RAS p21 protein activator 1	15	15	0	14	6.35e-07	0.000749
KMT2D	lysine methyltransferase 2D	51	51	4	41	1.32e-06	0.00147
FOSL2	FOS like antigen 2	8	8	1	8	3.3e-06	0.00346
NF2	neurofibromin 2	8	8	0	8	5.13e-06	0.00509
CTCF	CCCTC-binding factor	16	15	1	14	1.08e-05	0.0102
NOTCH2	notch 2	19	19	1	18	5.28e-05	0.0433
SMAD4	SMAD family member 4	10	10	1	9	8.25e-05	0.0648
PSIP1	PC4 and SFRS1 interacting protein 1	8	8	0	8	8.69e-05	0.0656
NFE2L2	nuclear factor, erythroid 2 like 2	19	16	2	18	9.23e-05	0.0669
RAC1	ras-related C3 botulinum toxin substrate 1	1	7	0	10	0.000112	0.0783
		]1
EIF2S2	eukaryotic translation initiation factor 2 subunit beta	7	6	1	7	0.000181	0.118
PODXL	podocalyxin like	8	7	0	7	0.000273	0.166

## Sheet: S3D
gene	HPV-positive no. patients	HPV-positive	HPV-negative	HPV-negative	fold change in HPV-positive patients	p-value	FDR adjusted p-value
		% patients	no.	% patients
			patients
ZNF750	21	0.141	4	0.012	11.8	2.46e-08	5.9e-07	*
FGFR3	17	0.114	4	0.012	9.5	1.84e-06	4.23e-05	*
CYLD	11	0.074	2	0.006	12.3	7.73e-05	0.0017	*
CASZ1	14	0.094	5	0.015	6.3	0.000111	0.00232	*
PTEN	13	0.087	5	0.015	5.8	0.000282	0.00564	*
DDX3X	8	0.054	1	0.003	17.9	0.000476	0.00904	*
PIK3CA	42	0.282	51	0.153	1.8	0.00116	0.0209	*
ASAP1	9	0.06	4	0.012	5	0.00445	0.0756
NFKBIA	4	0.027	0	0	NaN	0.00881	0.141
TRAF3	5	0.034	1	0.003	11.2	0.012	0.18
RBL1	9	0.06	6	0.018	3.4	0.0205	0.287
SLTM	5	0.034	2	0.006	5.6	0.0315	0.409
RB1	9	0.06	7	0.021	2.9	0.0492	0.59
EP300	18	0.121	22	0.066	1.8	0.0498	0.59
RIPK4	6	0.04	4	0.012	3.4	0.076	0.76
IFNGR1	4	0.027	2	0.006	4.5	0.0761	0.76
TAF5	4	0.027	2	0.006	4.5	0.0761	0.76
HIST1H2AE	4	0.027	2	0.006	4.5	0.0761	0.76
STAT1	4	0.027	4	0.012	2.2	0.259	1
BBX	5	0.034	6	0.018	1.9	0.327	1
TGFBR2	5	0.034	18	0.054	0.6	0.488	1
NSD1	10	0.067	27	0.081	0.8	0.712	1
KMT2D	20	0.134	41	0.123	1.1	0.767	1
FBXW7	11	0.074	22	0.066	1.1	0.845	1

## Sheet: S3E
gene	HPV-positive no. patients	HPV-positive	HPV-negative	HPV-negative	fold change in HPV-negative patients	p-value	FDR adjusted p-value
		% patients	no.	% patients
			patients
TP53	2	0.013	267	0.799	59.6	7.74e-68	1.93e-66	*
CDKN2A	0	0	83	0.249	NaN	1.82e-15	4.36e-14	*
FAT1	4	0.027	91	0.272	10.1	3.43e-12	7.9e-11	*
CASP8	2	0.013	52	0.156	11.6	4.46e-07	9.81e-06	*
NOTCH1	9	0.06	64	0.192	3.2	0.000102	0.00215	*
PIK3CA	42	0.282	51	0.153	0.5	0.00116	0.0232	*
HRAS	2	0.013	28	0.084	6.2	0.00183	0.0348	*
RASA1	0	0	14	0.042	NaN	0.00707	0.127
AJUBA	2	0.013	17	0.051	3.8	0.0728	1
PODXL	0	0	7	0.021	NaN	0.106	1
NF2	0	0	8	0.024	NaN	0.114	1
PSIP1	0	0	8	0.024	NaN	0.114	1
NOTCH2	3	0.02	18	0.054	2.7	0.145	1
NFE2L2	4	0.027	18	0.054	2	0.241	1
FOSL2	1	0.007	8	0.024	3.6	0.286	1
CTCF	3	0.02	14	0.042	2.1	0.293	1
HLA-B	4	0.027	17	0.051	1.9	0.334	1
EPHA2	4	0.027	17	0.051	1.9	0.334	1
RAC1	2	0.013	10	0.03	2.2	0.359	1
EIF2S2	1	0.007	7	0.021	3.1	0.445	1
TGFBR2	5	0.034	18	0.054	1.6	0.488	1
SMAD4	2	0.013	9	0.027	2	0.516	1
NSD1	10	0.067	27	0.081	1.2	0.712	1
KMT2D	20	0.134	41	0.123	0.9	0.767	1
FBXW7	11	0.074	22	0.066	0.9	0.845	1

## Sheet: S3F
	hg19		hg38
gene	no. somatic variants	no. non-synonymous variants	no. somatic variants	no. non-synonymous variants
TP53	216	203	216	205
FAT1	98	86	96	84
CDKN2A	41	40	42	42
NOTCH1	54	47	53	48
CASP8	48	45	48	45
PIK3CA	37	35	37	36
KMT2D	42	38	48	43
HRAS	22	22	12	12
NSD1	25	24	24	23
FBXW7	19	19	20	20
TGFBR2	13	13	14	13
NOTCH2	26	17	21	19
NFE2L2	17	14	17	14
HLA-B	17	16	9	4
AJUBA	14	11	15	12
EPHA2	18	15	18	15
RASA1	11	7	13	8
CTCF	10	8	10	8
RAC1	10	9	10	9
SMAD4	8	6	9	6
FOSL2	8	7	8	7
NF2	6	6	6	6
PSIP1	5	2	5	2
EIF2S2	5	4	5	4
PODXL	4	3	8	4

## Sheet: S3G
gene	less than 10 packs			greater than 10 packs			P-value	adjusted p-value
	#mutated	#total	%total	#mutated	#total	%total
AJUBA	2	66	0.0303	0	69	0	0.24	1
CASP8	1	66	0.0152	1	69	0.0145	1	1
CTCF	1	66	0.0152	2	69	0.029	1	1
EIF2S2	1	66	0.0152	0	69	0	0.49	1
EPHA2	2	66	0.0303	2	69	0.029	1	1
FAT1	3	66	0.0455	1	69	0.0145	0.36	1
FBXW7	4	66	0.0606	5	69	0.0725	1	1
FOSL2	0	66	0	1	69	0.0145	1	1
HLA-B	3	66	0.0455	1	69	0.0145	0.36	1
HRAS	0	66	0	2	69	0.029	0.5	1
KMT2D	8	66	0.1212	11	69	0.1594	0.62	1
NFE2L2	3	66	0.0455	1	69	0.0145	0.36	1
NOTCH1	6	66	0.0909	2	69	0.029	0.16	1
NOTCH2	2	66	0.0303	1	69	0.0145	0.61	1
NSD1	5	66	0.0758	4	69	0.058	0.74	1
PIK3CA	20	66	0.303	19	69	0.2754	0.85	1
RAC1	0	66	0	2	69	0.029	0.5	1
SMAD4	2	66	0.0303	0	69	0	0.24	1
TGFBR2	2	66	0.0303	2	69	0.029	1	1
TP53	0	66	0	2	69	0.029	0.5	1
AJUBA, CASP8, CTCF, EIF2S2, EPHA2, FAT1, FBXW7, FOSL2, HLA-B, HRAS, KMT2D, NFE2L2, NOTCH1, NOTCH2, NSD1, PIK3CA, RAC1, SMAD4, TGFBR2, TP53	39	66	0.5909	38	69	0.5507	0.73	1

## Sheet: S3H
gene	HPV-positive oral cancer			Cervical cancer			p-value	FDR adjusted p-value
		#total samples	fraction of mutated samples (%total)	#samples with mutation	#total samples	fraction of mutated samples (%total)
	#samples with mutation
PIK3CA	42	149	0.282	98	305	0.321	0.449	0.673
ZNF750	21	149	0.141	8	305	0.026	1.37e-05	0.000164	*
KMT2D	20	149	0.134	43	305	0.141	0.886	0.925
EP300	18	149	0.121	37	305	0.121	1	1
FGFR3	17	149	0.114	0	305	0	3.12e-09	7.49e-08	*
CASZ1	14	149	0.094	5	305	0.016	0.000236	0.00189	*
PTEN	13	149	0.087	20	305	0.066	0.443	0.673
CYLD	11	149	0.074	3	305	0.01	0.000489	0.00294	*
FBXW7	11	149	0.074	35	305	0.115	0.189	0.414
NSD1	10	149	0.067	19	305	0.062	0.84	0.916
RB1	9	149	0.06	16	305	0.052	0.827	0.916
RBL1	9	149	0.06	7	305	0.023	0.0564	0.169
ASAP1	9	149	0.06	6	305	0.02	0.0456	0.156
DDX3X	8	149	0.054	10	305	0.033	0.31	0.532
RIPK4	6	149	0.04	1	305	0.003	0.00593	0.0285	*
TRAF3	5	149	0.034	7	305	0.023	0.54	0.763
BBX	5	149	0.034	4	305	0.013	0.162	0.414
SLTM	5	149	0.034	2	305	0.007	0.0411	0.156
TGFBR2	5	149	0.034	8	305	0.026	0.766	0.916
NFKBIA	4	149	0.027	3	305	0.01	0.224	0.414
IFNGR1	4	149	0.027	7	305	0.023	0.756	0.916
TAF5	4	149	0.027	3	305	0.01	0.224	0.414
HIST1H2AE	4	149	0.027	3	305	0.01	0.224	0.414
STAT1	4	149	0.027	6	305	0.02	0.735	0.916

## Sheet: S3I
gene	HPV-positive oral cancer			Cervical cancer			p-value	FDR adjusted p-value
	#samples with mutation	#total samples	fraction of mutated samples (%total)	#samples with mutation	#total samples	fraction of mutated samples (%total)
PIK3CA	42	149	0.282	98	305	0.321	0.449	0.786
EP300	18	149	0.121	37	305	0.121	1	1
FBXW7	11	149	0.074	35	305	0.115	0.189	0.663
PTEN	13	149	0.087	20	305	0.066	0.443	0.786
HLA-A	3	149	0.02	18	305	0.059	0.0932	0.435
ARID1A	5	149	0.034	19	305	0.062	0.265	0.742
NFE2L2	4	149	0.027	16	305	0.052	0.329	0.768
HLA-B	4	149	0.027	11	305	0.036	0.782	0.996
KRAS	1	149	0.007	17	305	0.056	0.00959	0.134
ERBB3	5	149	0.034	14	305	0.046	0.625	0.973
MAPK1	6	149	0.04	12	305	0.039	1	1
CASP8	2	149	0.013	15	305	0.049	0.0676	0.435
TGFBR2	5	149	0.034	8	305	0.026	0.766	0.996
SHKBP1	1	149	0.007	3	305	0.01	1	1
