# Supplementary material for: Human papillomavirus and the landscape of secondary genetic alterations in oral cancers
Source: HighWire-hosted journal article supplement (doi:10.1101/gr.241141.118), 2018-12-18
Supplement: Supplemental_Table_S5.xlsx [file Supplemental_Table_S5.xlsx]

## Sheet: S5A
gene	mutation (SNVs & Indels)		CNV (gain)		CNV (loss)		CNV (gain or loss)		any alteration (mutation or CNV)
	#mutated	%total	#gain	%total	#loss	%total	#altered	%total	#altered	%total
PIK3CA	42	0.282	100	0.671	0	0	100	0.671	106	0.711
ZNF750	21	0.141	7	0.047	17	0.114	24	0.161	42	0.282
KMT2D	20	0.134	5	0.034	0	0	5	0.034	25	0.168
EP300	18	0.121	3	0.02	5	0.034	8	0.054	25	0.168
FGFR3	17	0.114	7	0.047	10	0.067	17	0.114	31	0.208
CASZ1	14	0.094	6	0.04	12	0.081	18	0.121	28	0.188
PTEN	13	0.087	1	0.007	28	0.188	29	0.195	37	0.248
CYLD	11	0.074	1	0.007	32	0.215	33	0.221	37	0.248
FBXW7	11	0.074	5	0.034	10	0.067	15	0.101	24	0.161
NSD1	10	0.067	6	0.04	7	0.047	13	0.087	20	0.134
RB1	9	0.06	2	0.013	51	0.342	53	0.356	60	0.403
RBL1	9	0.06	23	0.154	7	0.047	30	0.201	37	0.248
ASAP1	9	0.06	41	0.275	1	0.007	42	0.282	47	0.315
DDX3X	8	0.054	13	0.087	3	0.02	16	0.107	23	0.154
RIPK4	6	0.04	8	0.054	7	0.047	15	0.101	19	0.128
TRAF3	5	0.034	2	0.013	34	0.228	36	0.242	38	0.255
BBX	5	0.034	67	0.45	1	0.007	68	0.456	70	0.47
SLTM	5	0.034	1	0.007	5	0.034	6	0.04	11	0.074
TGFBR2	5	0.034	3	0.02	24	0.161	27	0.181	32	0.215
NFKBIA	4	0.027	1	0.007	16	0.107	17	0.114	18	0.121
IFNGR1	4	0.027	4	0.027	13	0.087	17	0.114	21	0.141
TAF5	4	0.027	2	0.013	18	0.121	20	0.134	24	0.161
HIST1H2AE	4	0.027	8	0.054	11	0.074	19	0.128	23	0.154
STAT1	4	0.027	3	0.02	5	0.034	8	0.054	9	0.06

## Sheet: S5B
gene	mutation (SNVs & Indels)		CNV (gain)		CNV (loss)		CNV (gain/loss)		any alteration (mutation /CNV)
	#mutated	%total	#gain	%total	#loss	%total	#altered	%total	#altered	%total
TP53	267	0.812	7	0.021	15	0.046	22	0.067	270	0.821
FAT1	91	0.277	4	0.012	40	0.122	44	0.134	122	0.371
CDKN2A	83	0.252	7	0.021	133	0.404	140	0.426	213	0.647
NOTCH1	64	0.195	27	0.082	17	0.052	44	0.134	99	0.301
CASP8	52	0.158	14	0.043	10	0.03	24	0.073	75	0.228
PIK3CA	51	0.155	117	0.356	0	0	117	0.356	153	0.465
KMT2D	41	0.125	4	0.012	6	0.018	10	0.03	49	0.149
HRAS	28	0.085	12	0.036	13	0.04	25	0.076	47	0.143
NSD1	27	0.082	6	0.018	29	0.088	35	0.106	57	0.173
FBXW7	22	0.067	2	0.006	15	0.046	17	0.052	38	0.116
TGFBR2	18	0.055	1	0.003	60	0.182	61	0.185	77	0.234
NOTCH2	18	0.055	7	0.021	27	0.082	34	0.103	50	0.152
NFE2L2	18	0.055	33	0.1	3	0.009	36	0.109	51	0.155
HLA-B	17	0.052	7	0.021	6	0.018	13	0.04	29	0.088
AJUBA	17	0.052	28	0.085	11	0.033	39	0.119	50	0.152
EPHA2	17	0.052	7	0.021	8	0.024	15	0.046	32	0.097
RASA1	14	0.043	2	0.006	29	0.088	31	0.094	42	0.128
CTCF	14	0.043	6	0.018	5	0.015	11	0.033	25	0.076
RAC1	10	0.03	47	0.143	0	0	47	0.143	57	0.173
SMAD4	9	0.027	2	0.006	50	0.152	52	0.158	57	0.173
FOSL2	8	0.024	8	0.024	2	0.006	10	0.03	18	0.055
NF2	8	0.024	21	0.064	9	0.027	30	0.091	36	0.109
PSIP1	8	0.024	29	0.088	28	0.085	57	0.173	65	0.198
EIF2S2	7	0.021	48	0.146	1	0.003	49	0.149	55	0.167
PODXL	7	0.021	9	0.027	11	0.033	20	0.061	26	0.079

## Sheet: S5C
gene	HPV-positive no. patients	HPV-positive % patients	HPV-negative no. patients	HPV-negative % patients	fold change in HPV-positive patients	p-value	FDR adjusted p-value
RB1	54	0.3624	35	0.1045	3.47	1.04e-10	2.49e-09	**
ZNF750	38	0.255	16	0.0478	5.34	2.09e-10	4.8e-09	**
BBX	61	0.4094	54	0.1612	2.54	9.08e-09	2e-07	**
CYLD	35	0.2349	17	0.0507	4.63	1.05e-08	2.21e-07	**
PTEN	35	0.2349	18	0.0537	4.37	2.11e-08	4.21e-07	**
PIK3CA	100	0.6711	145	0.4328	1.55	1.28e-06	2.44e-05	**
TAF5	22	0.1477	11	0.0328	4.5	1.48e-05	0.000266	**
CASZ1	27	0.1812	18	0.0537	3.37	2.61e-05	0.000444	**
HIST1H2AE	20	0.1342	14	0.0418	3.21	0.000742	0.0119	*
IFNGR1	19	0.1275	14	0.0418	3.05	0.00132	0.0198	*
RBL1	33	0.2215	43	0.1284	1.73	0.0143	0.2
TRAF3	31	0.2081	42	0.1254	1.66	0.027	0.351
SLTM	10	0.0671	10	0.0299	2.25	0.0805	0.966
DDX3X	19	0.1275	25	0.0746	1.71	0.0853	0.966
FGFR3	26	0.1745	39	0.1164	1.5	0.111	1
FBXW7	22	0.1477	34	0.1015	1.45	0.166	1
ASAP1	43	0.2886	115	0.3433	0.84	0.25	1
EP300	24	0.1611	42	0.1254	1.28	0.316	1
RIPK4	18	0.1208	31	0.0925	1.31	0.333	1
NSD1	20	0.1342	56	0.1672	0.8	0.417	1
STAT1	8	0.0537	25	0.0746	0.72	0.442	1
KMT2D	24	0.1611	47	0.1403	1.15	0.579	1
NFKBIA	16	0.1074	32	0.0955	1.12	0.742	1
TGFBR2	28	0.1879	68	0.203	0.93	0.805	1

## Sheet: S5D
gene	HPV-positive no. patients	HPV-positive % patients	HPV-negative no. patients	HPV-negative % patients	fold change in HPV-negative patients	p-value	FDR adjusted p-value
TP53	11	0.0738	269	0.803	10.88	2.64e-55	6.61e-54	**
CDKN2A	9	0.0604	205	0.6119	10.13	1.03e-33	2.48e-32	**
FAT1	10	0.0671	118	0.3522	5.25	2.64e-12	6.07e-11	**
PIK3CA	100	0.6711	145	0.4328	0.64	1.28e-06	2.82e-05	**
RAC1	4	0.0268	50	0.1493	5.56	2.98e-05	0.000627	**
CTCF	31	0.2081	24	0.0716	0.34	3.58e-05	0.000716	**
CASP8	10	0.0671	70	0.209	3.11	5.69e-05	0.00108	**
PSIP1	10	0.0671	58	0.1731	2.58	0.00167	0.03	*
NOTCH1	24	0.1611	96	0.2866	1.78	0.003	0.051
EIF2S2	36	0.2416	47	0.1403	0.58	0.00872	0.139
NOTCH2	9	0.0604	44	0.1313	2.17	0.0263	0.394
HRAS	10	0.0671	45	0.1343	2	0.0307	0.43
NF2	6	0.0403	32	0.0955	2.37	0.0432	0.561
SMAD4	12	0.0805	49	0.1463	1.82	0.0531	0.638
RASA1	9	0.0604	37	0.1104	1.83	0.0941	1
HLA-B	19	0.1275	28	0.0836	0.66	0.137	1
FBXW7	22	0.1477	34	0.1015	0.69	0.166	1
NFE2L2	14	0.094	47	0.1403	1.49	0.183	1
NSD1	20	0.1342	56	0.1672	1.25	0.417	1
KMT2D	24	0.1611	47	0.1403	0.87	0.579	1
EPHA2	15	0.1007	29	0.0866	0.86	0.611	1
PODXL	12	0.0805	24	0.0716	0.89	0.711	1
AJUBA	17	0.1141	43	0.1284	1.13	0.765	1
TGFBR2	28	0.1879	68	0.203	1.08	0.805	1
FOSL2	6	0.0403	16	0.0478	1.19	0.817	1

## Sheet: S5E
Sample ID	virus type	position	reference allele	alternative allele	gene	consequence	amino acid change
GS18035	HPV16	712	C	A	E7	missense	51H>N
GS18081	HPV16	749	C	G	E7	missense	63S>C
GS18047	HPV16	784	G	A	E7	missense	75D>N
GS18014	HPV16	822	A	G	E7	missense	87L>M

## Sheet: S5F
	RB1 WT	RB1 mutation
E7-WT	83	3
E7-mutation	4	0
	RB1 normal copy number	RB1 copy number loss
E7-WT	63	23
E7-mutation	2	2
	RB1 WT and normal copy number	RB1 mutation and/or copy number loss
E7-WT	60	26
E7-mutation	2	2

## Sheet: S5G
chr. arm	frequency mean (%sample)	frequency range (%sample)	gained length (Mbp)	% chr. arm gained	adj. p-value (mean)	adj. p-value (range)
1q	0.129	12.6-14.6%	40	0.322	0.00183	2.76E-04-2.24E-03
3q	0.55	31.1-68.0%	104.5	0.976	0	0.00E+00-0.00E+00
5p	0.166	13.6-20.4%	46	0.95	0.000134	0.00E+00-7.81E-04
8p	0.136	13.6-13.6%	0.5	0.011	0.000781	7.81E-04-7.81E-04
8q	0.202	14.6-27.2%	98	0.973	1.69e-05	0.00E+00-2.76E-04
19q	0.145	13.6-17.5%	13.5	0.414	0.000501	6.93E-06-7.81E-04
20p	0.15	13.6-17.5%	25.5	0.927	0.000299	6.93E-06-7.81E-04
20q	0.205	13.6-25.2%	7.5	0.211	9.09e-05	0.00E+00-7.81E-04
chr. arm	frequency mean (%sample)	frequency range (%sample)	lost length (Mbp)	% chr. arm lost	adj. p-value (mean)	adj. p-value (range)
1p	0.311	28.2-33.0%	1.5	0.012	0	0.00E+00-0.00E+00
1q	0.228	18.4-27.2%	1	0.008	4.33e-07	0.00E+00-8.66E-07
2p	0.184	16.5-20.4%	1	0.011	4.33e-06	8.66E-07-7.79E-06
2q	0.135	11.7-23.3%	14.5	0.097	0.00102	0.00E+00-3.15E-03
3p	0.152	11.7-19.4%	78	0.857	0.00046	8.66E-07-3.15E-03
4p	0.117	11.7-11.7%	0.5	0.01	0.00315	3.15E-03-3.15E-03
5q	0.644	60.2-68.9%	1.5	0.011	0	0.00E+00-0.00E+00
7q	0.155	11.7-42.7%	4.5	0.045	0.00223	0.00E+00-3.15E-03
8p	0.207	13.6-32.0%	1.5	0.033	0.000108	0.00E+00-3.15E-04
9p	0.37	15.5-55.3%	8.5	0.173	1.37e-06	0.00E+00-2.34E-05
9q	0.413	12.6-43.7%	19	0.206	2.81e-05	0.00E+00-1.04E-03
10p	0.155	15.5-15.5%	0.5	0.012	2.34e-05	2.34E-05-2.34E-05
10q	0.135	11.7-59.2%	18	0.189	0.00268	0.00E+00-3.15E-03
11q	0.382	11.7-49.5%	67.5	0.83	2.43e-05	0.00E+00-3.15E-03
13q	0.193	11.7-27.2%	67.5	0.694	0.000185	0.00E+00-3.15E-03
14q	0.181	12.6-23.3%	45.5	0.507	9.12e-05	0.00E+00-1.04E-03
15q	0.249	12.6-53.4%	2.5	0.03	0.000417	0.00E+00-1.04E-03
16p	0.165	15.5-17.5%	1.5	0.041	1.13e-05	2.60E-06-2.34E-05
16q	0.185	15.5-21.4%	44	0.819	2.68e-06	0.00E+00-2.34E-05
17q	0.165	16.5-16.5%	0.5	0.009	7.79e-06	7.79E-06-7.79E-06
21p	0.172	15.5-18.4%	1.5	0.114	8.95e-06	8.66E-07-2.34E-05
22q	0.184	18.4-18.4%	0.5	0.014	8.66e-07	8.66E-07-8.66E-07

## Sheet: S5H
chr. arm	frequency mean (%sample)	frequency range (%sample)	gained length (Mbp)	% chr. arm gained	adj. p-value (mean)	adj. p-value (range)
3q	0.342	20.0-48.0%	66.5	0.621	0.000194	0.00E+00-1.18E-03
5p	0.331	30.0-40.0%	46.5	0.961	1.12e-07	0.00E+00-8.66E-07
7p	0.226	20.0-30.0%	50.5	0.843	0.000472	8.66E-07-1.18E-03
8p	0.23	20.0-24.0%	2	0.044	0.000347	7.01E-05-1.18E-03
8q	0.405	24.0-54.0%	100	0.992	4.85e-07	0.00E+00-7.01E-05
9p	0.203	20.0-22.0%	3	0.061	0.00103	2.89E-04-1.18E-03
11q	0.293	20.0-48.0%	11	0.135	0.000265	0.00E+00-1.18E-03
14q	0.245	20.0-32.0%	76.5	0.852	0.000229	0.00E+00-1.18E-03
20p	0.204	20.0-22.0%	9.5	0.345	0.000992	2.89E-04-1.18E-03
20q	0.224	20.0-26.0%	25	0.704	0.000352	1.39E-05-1.18E-03
chr. arm	frequency mean (%sample)	frequency range (%sample)	lost length (Mbp)	% chr. arm lost	adj. p-value (mean)	adj. p-value (range)
1p	0.32	28.0-34.0%	1.5	0.012	0	0.00E+00-0.00E+00
1q	0.27	24.0-30.0%	1	0.008	0	0.00E+00-0.00E+00
2q	0.18	16.0-20.0%	1	0.007	6.84e-05	2.60E-06-1.34E-04
3p	0.23	16.0-34.0%	90.5	0.995	2.48e-05	0.00E+00-1.34E-04
4p	0.22	22.0-22.0%	0.5	0.01	0	0.00E+00-0.00E+00
4q	0.18	18.0-18.0%	0.5	0.004	1.9e-05	1.90E-05-1.90E-05
5q	0.687	62.0-72.0%	1.5	0.011	0	0.00E+00-0.00E+00
7q	0.4	40.0-40.0%	0.5	0.005	0	0.00E+00-0.00E+00
8p	0.2	16.0-44.0%	42.5	0.932	3.61e-05	0.00E+00-1.34E-04
9p	0.319	16.0-58.0%	12.5	0.255	1.72e-05	0.00E+00-1.34E-04
9q	0.404	16.0-44.0%	21	0.228	3.65e-06	0.00E+00-1.34E-04
10q	0.32	18.0-46.0%	1	0.01	9.52e-06	0.00E+00-1.90E-05
11q	0.169	16.0-20.0%	10	0.123	9.22e-05	2.60E-06-1.34E-04
14q	0.18	18.0-18.0%	0.5	0.006	1.9e-05	1.90E-05-1.90E-05
15q	0.293	22.0-40.0%	1.5	0.018	0	0.00E+00-0.00E+00
17q	0.24	24.0-24.0%	0.5	0.009	0	0.00E+00-0.00E+00
18q	0.209	16.0-28.0%	26.5	0.435	3.42e-05	0.00E+00-1.34E-04
21p	0.287	26.0-32.0%	1.5	0.114	0	0.00E+00-0.00E+00
21q	0.162	16.0-18.0%	5	0.143	0.000123	1.90E-05-1.34E-04

## Sheet: S5I
arm	#genes	#genes with expression (variance > 0.3)	#genes tested (gain vs. normal)	#genes differentially expressed (gain vs. normal)	%genes (gain vs. normal)	#genes tested (loss vs. normal)	#genes differentially expressed (loss vs. normal)	%genes (loss vs. normal)
1p	1142	801	798	20	0.025	327	7	0.021
1q	917	668	665	48	0.072	29	1	0.034
2p	565	383	76	2	0.026	86	2	0.023
2q	776	584	156	2	0.013	528	36	0.068
3p	509	375	168	2	0.012	375	79	0.211
3q	604	570	570	301	0.528	3	0	NA
4p	214	158	88	0	0	158	11	0.07
4q	486	376	173	4	0.023	223	9	0.04
5p	164	130	130	32	0.246	4	0	NA
5q	725	517	71	1	0.014	82	1	0.012
6p	583	457	457	6	0.013	422	22	0.052
6q	441	334	78	1	0.013	334	8	0.024
7p	330	240	129	4	0.031	5	0	NA
7q	645	489	187	2	0.011	299	19	0.064
8p	250	204	204	17	0.083	182	2	0.011
8q	458	366	366	81	0.221	7	0	NA
9p	209	153	138	8	0.058	17	0	NA
9q	565	407	398	5	0.013	27	0	0
10p	170	125	124	4	0.032	125	6	0.048
10q	550	410	18	1	NA	410	54	0.132
11p	346	262	29	1	0.034	235	9	0.038
11q	676	492	259	8	0.031	456	86	0.189
12p	295	260	260	28	0.108	224	4	0.018
12q	770	518	178	3	0.017	3	0	NA
13q	328	256	135	5	0.037	256	43	0.168
14q	829	648	255	3	0.012	648	74	0.114
15q	647	466	8	0	NA	437	8	0.018
16p	489	345	43	1	0.023	345	7	0.02
16q	386	291	1	0	NA	291	90	0.309
17p	350	264	20	0	0	264	20	0.076
17q	820	584	391	10	0.026	125	9	0.072
18p	88	66	66	5	0.076	2	0	NA
18q	208	155	155	9	0.058	16	0	NA
19p	584	422	422	1	0.002	408	15	0.037
19q	761	605	605	55	0.091	2	0	NA
20p	165	118	118	16	0.136	4	0	NA
20q	329	246	246	59	0.24	182	8	0.044
21p	1	1	0	0	NA	1	0	NA
21q	210	159	132	1	0.008	102	2	0.02
22q	517	381	12	0	NA	381	10	0.026
Total	19102	14286	8329	746	0.09	8025	642	0.08

## Sheet: S5J
arm	#genes	#genes with expression (variance > 0.3)	#genes tested (gain vs. normal)	#genes differentially expressed (gain vs. normal)	%genes (gain vs. normal)	#genes tested (loss vs. normal)	#genes differentially expressed (loss vs. normal)	%genes (loss vs. normal)
1p	1033	838	133	4	0.03	222	4	0.018
1q	812	656	618	26	0.042	12	0	NA
2p	514	400	8	0	NA	42	2	0.048
2q	681	594	262	22	0.084	224	1	0.004
3p	442	354	2	0	NA	354	1	0.003
3q	523	463	463	39	0.084	0	0	NA
4p	187	168	168	4	0.024	39	0	0
4q	433	364	13	0	NA	103	0	0
5p	148	146	146	44	0.301	0	0	NA
5q	631	532	35	2	0.057	492	15	0.03
6p	500	435	64	2	0.031	6	0	NA
6q	390	325	256	7	0.027	93	4	0.043
7p	288	259	259	45	0.174	2	0	NA
7q	526	456	235	9	0.038	32	0	0
8p	206	202	145	17	0.117	202	2	0.01
8q	407	392	392	155	0.395	11	0	NA
9p	182	182	177	50	0.282	182	10	0.055
9q	510	456	378	10	0.026	84	2	0.024
10p	148	120	2	0	NA	25	0	0
10q	485	402	67	4	0.06	20	0	0
11p	319	280	40	1	0.025	4	0	NA
11q	651	601	592	146	0.247	319	5	0.016
12p	240	225	204	6	0.029	4	0	NA
12q	690	561	73	0	0	3	0	NA
13q	289	263	158	12	0.076	114	2	0.018
14q	691	611	611	79	0.129	142	2	0.014
15q	541	457	57	1	0.018	12	0	NA
16p	409	303	12	1	NA	12	0	NA
16q	359	293	2	0	NA	5	0	NA
17p	317	277	101	2	0.02	228	2	0.009
17q	722	596	329	12	0.036	92	1	0.011
18p	77	68	68	0	0	8	1	NA
18q	181	173	61	8	0.131	158	10	0.063
19p	506	389	4	0	NA	159	9	0.057
19q	665	534	19	0	NA	2	0	NA
20p	153	136	136	9	0.066	5	0	NA
20q	305	252	252	39	0.155	0	0	NA
21p	1	1	0	0	NA	1	0	NA
21q	179	161	3	0	0	161	1	0.006
22q	462	399	330	5	0.015	27	1	0.037
Total	16803	14324	6875	761	0.111	3601	75	0.021

[truncated: 22 more sheets: S5K, S5L, S5M, S5N, S5O, S5P, S5Q, S5S, S5T, S5U1, S5U2, S5U3, S5U4, S5U5, S5V1, S5V2, S5V4, S5V5, S5W2, S5W4 …]
