# Supplementary material for: Human papillomavirus and the landscape of secondary genetic alterations in oral cancers
Source: HighWire-hosted journal article supplement (doi:10.1101/gr.241141.118), 2018-12-18
Supplement: Supplemental_Table_S6.xlsx [file Supplemental_Table_S6.xlsx]

## Sheet: S6A
gene	#variants	#variants in top 5%	fraction of variants in top 5%	p-value	FDR adjusted p-value
TP53	251	104	0.414	1.36e-78	8.9e-75
CDKN2A	64	36	0.563	2.14e-34	7.01e-31
FAT1	94	22	0.234	5.31e-12	1.16e-08
NOTCH1	60	17	0.283	5.06e-11	8.31e-08
CASP8	50	13	0.26	2.93e-08	3.85e-05
EPHA2	16	7	0.438	9.11e-07	0.000997
HRAS	28	8	0.286	6.39e-06	0.006
NSD1	24	7	0.292	2.11e-05	0.0173
OR4C11	6	4	0.667	2.84e-05	0.0207
AJUBA	18	6	0.333	3.58e-05	0.0235
PIK3CA	50	9	0.18	9.4e-05	0.052
FBXW7	21	6	0.286	9.5e-05	0.052

## Sheet: S6B
gene	#variants	#variants in top 5%	fraction of variants in top 5%	p-value	FDR adjusted p-value
ZNF750	18	14	0.778	2.23e-19	7.56e-16
PIK3CA	41	10	0.244	8.75e-08	0.000148
EP300	18	7	0.389	2.21e-07	0.00025
CYLD	12	4	0.333	0.000203	0.138
NSD1	12	4	0.333	0.000203	0.138
